# Supplementary material for: Genome-wide analysis of human hotspot intersected genes highlights the roles of meiotic recombination in evolution and disease
Source: PubMed Central journal article supplement (PMC3620679; doi:10.1186/1471-2164-14-67), 2013-01-31

Graphs show the integrated chromosomal maps for hotspots, fragile sites, HI genes and disease genes. Chromosomal positions and bands are based on human genome hg18 obtained from UCSC.

The first rectangle stands for chromosomal ideograms.

Scheme for bands:

| color                                                                             | note                                                                                 |
|-----------------------------------------------------------------------------------|--------------------------------------------------------------------------------------|
|  | gneg - Giemsa negative bands                                                         |
|  | gpos25 - Giemsa positive bands                                                       |
|  | gpos50 - Giemsa positive bands                                                       |
|  | gpos75 - Giemsa positive bands                                                       |
|  | gpos100 - Giemsa positive bands                                                      |
|  | acen - centromeric regions                                                           |
|  | gvar - variable length heterochromatic regions                                       |
|  | stalk - tightly constricted regions on the short arms of the acrocentric chromosomes |

\*The Giemsa positive bands have further been subdivided into gpos25, gpos50, gpos75, and gpos100 with the higher number indicating a darker stain.

Each orange region in the second rectangle stands for a fragile site location.

Each red line in the third rectangle stands for a hotspot(10k bp).

The gray lines in the rightmost part of the graph stand for hg18rpa genes. The length of each line reflects the relative length of a gene. HI genes are colored red and annotated with '-' or '+' based on gene types in the left.

Scheme for gene types:

| Color  | Gene type    |
|--------|--------------|
| red    | MD genes     |
| purple | InteCR genes |

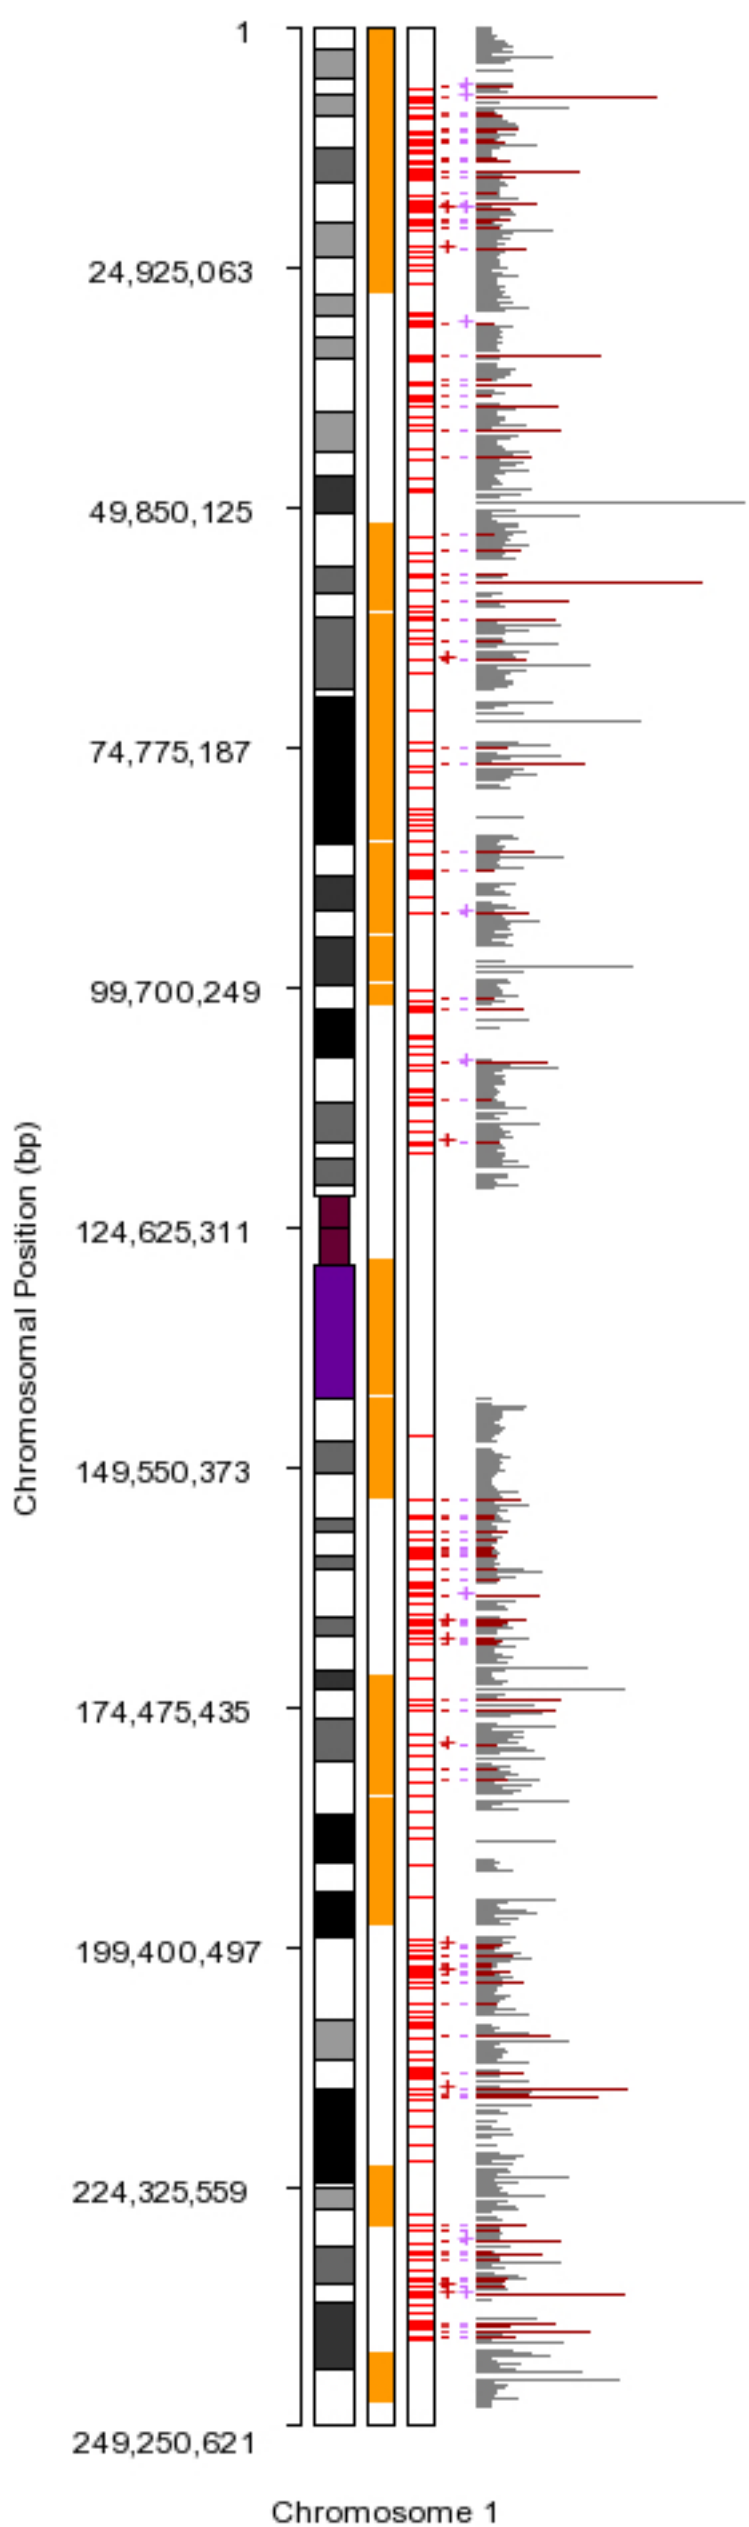

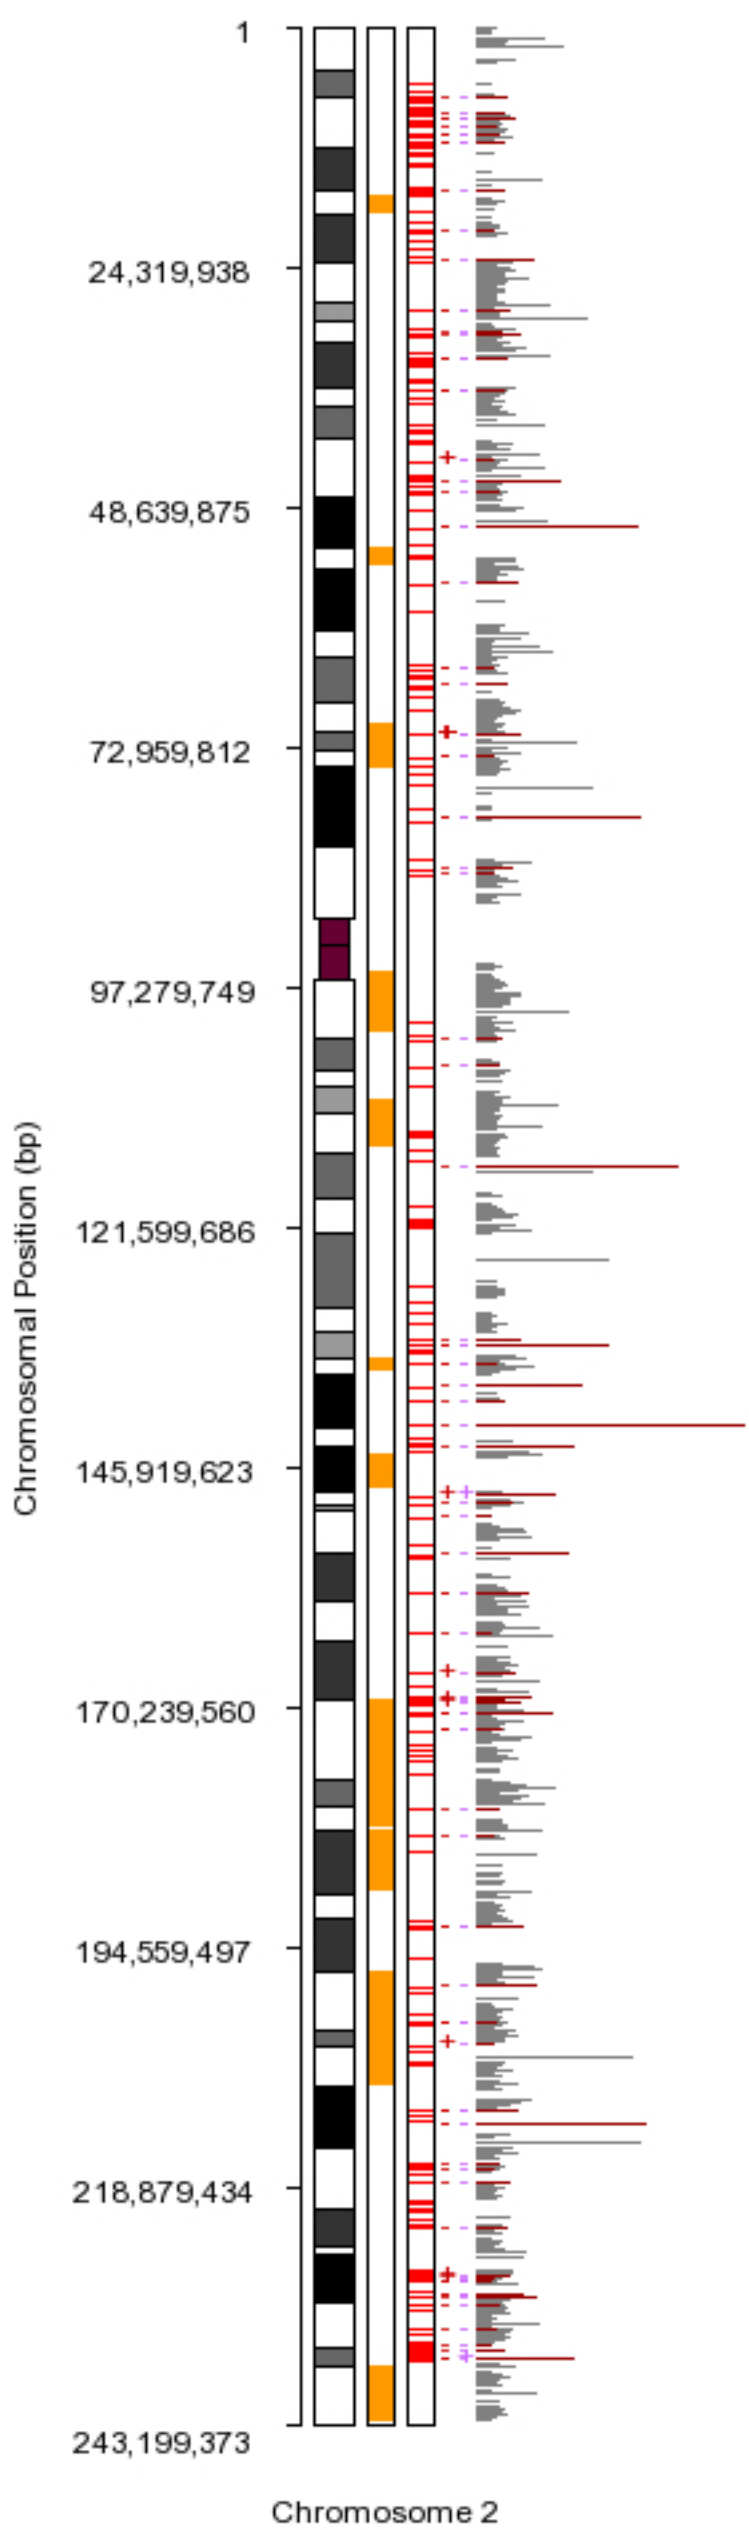

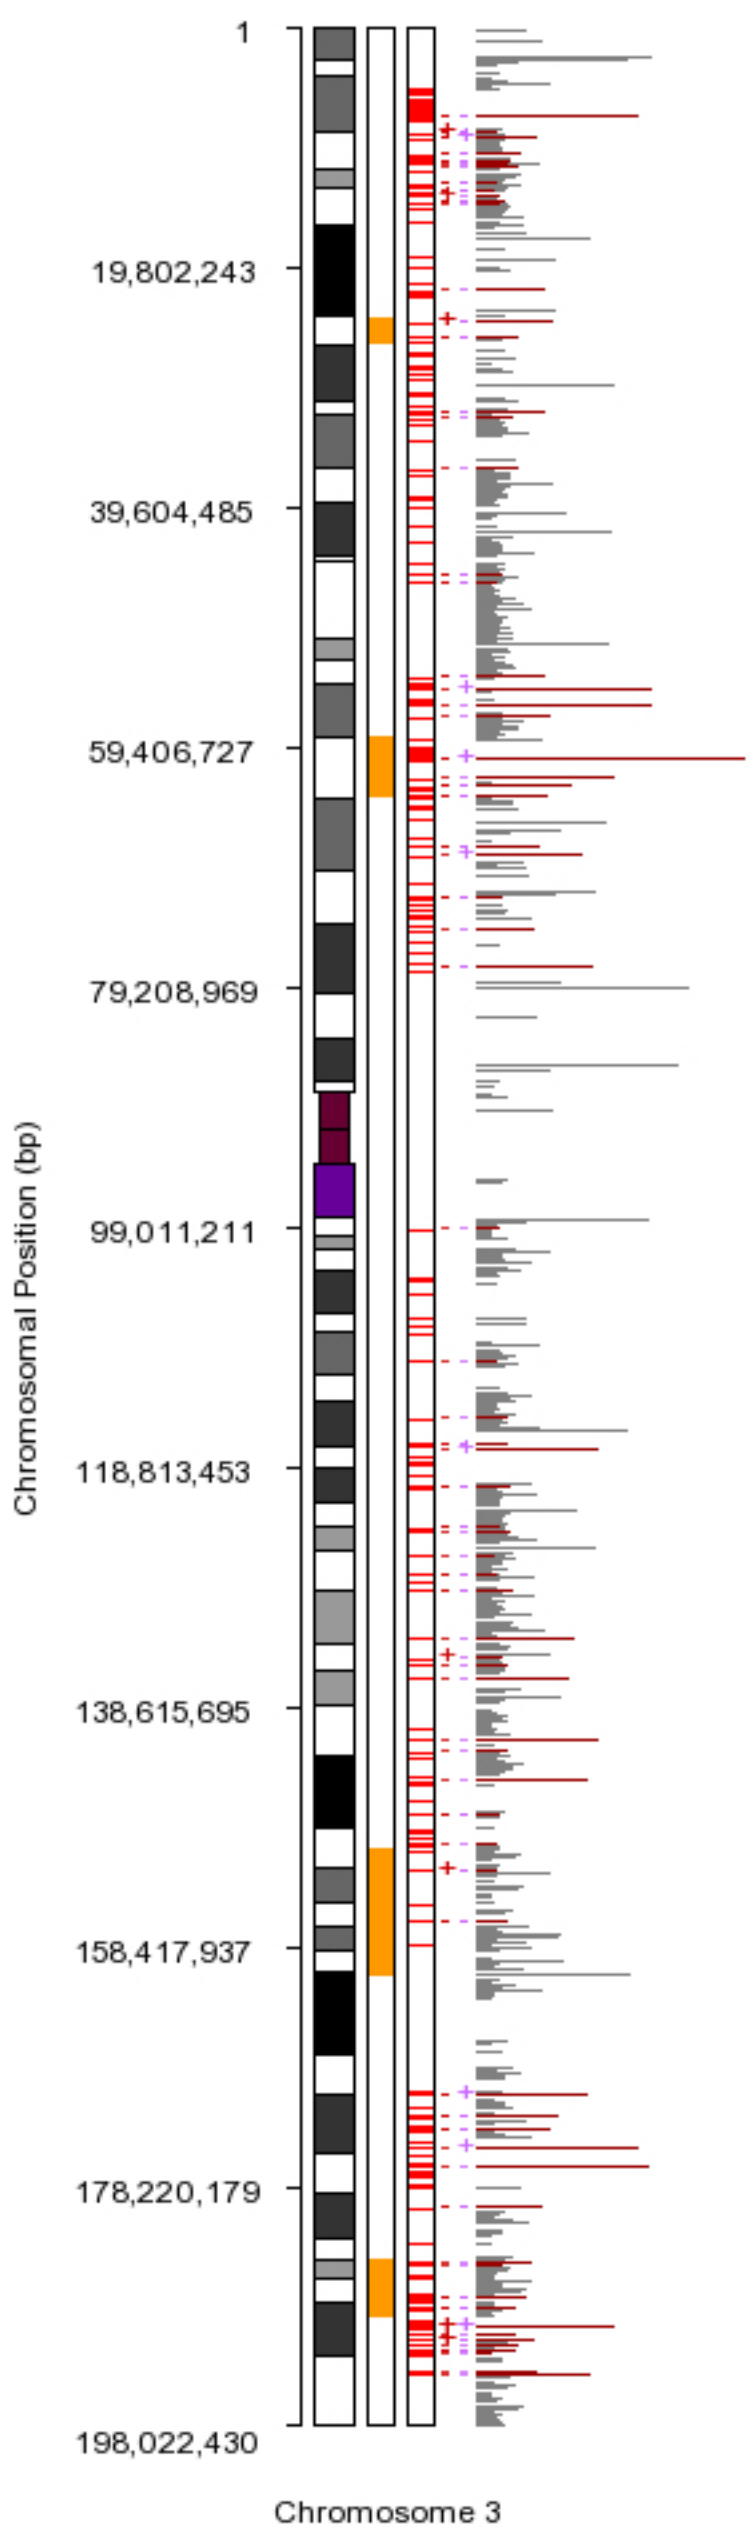

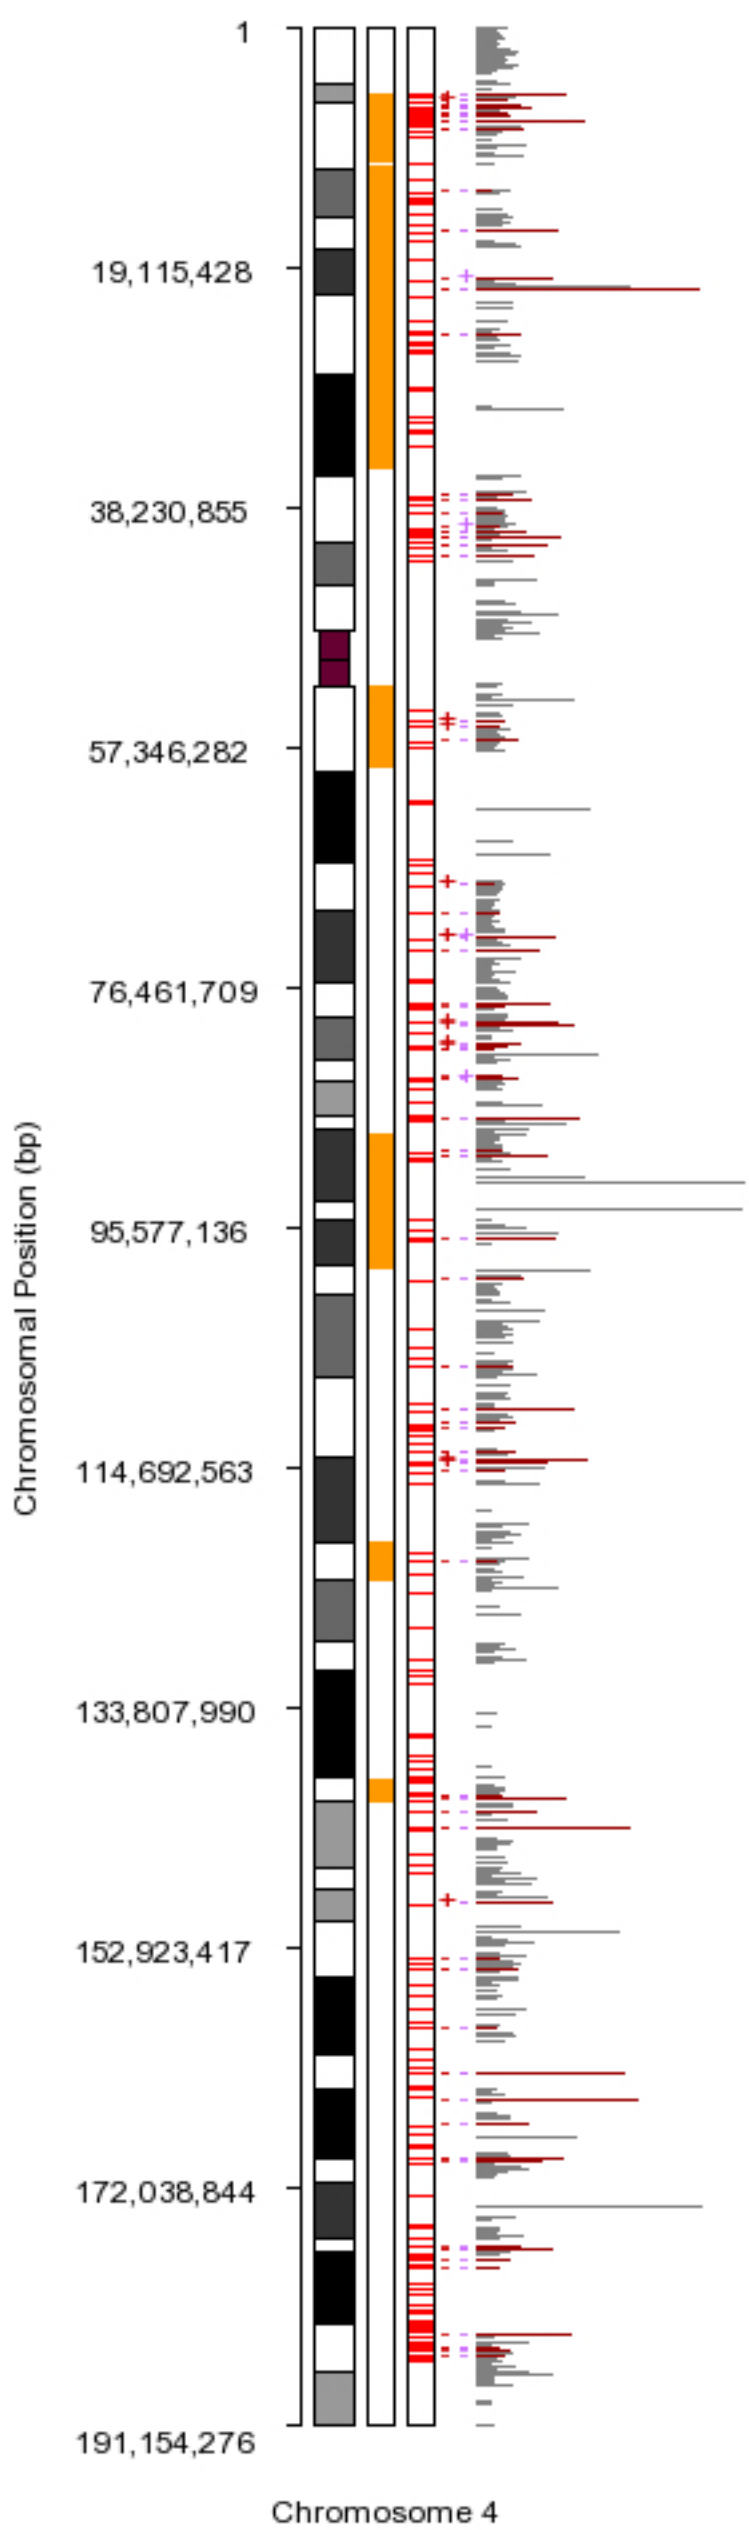

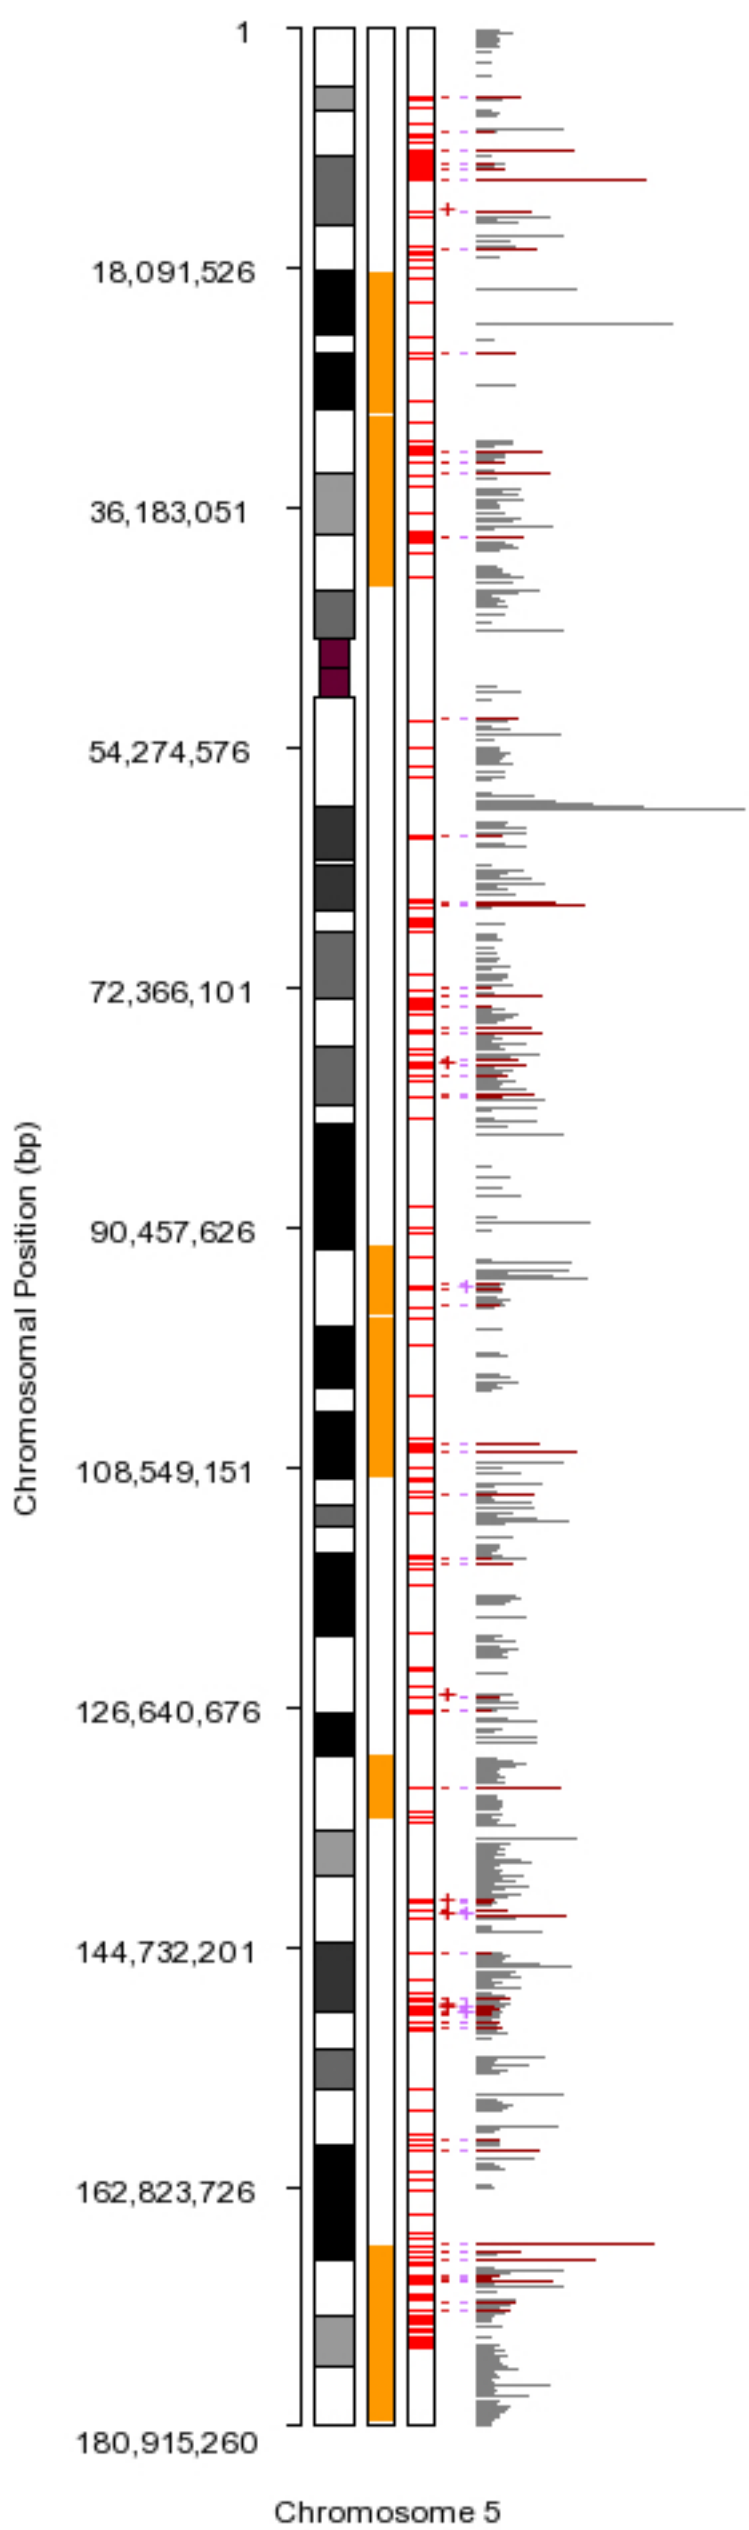



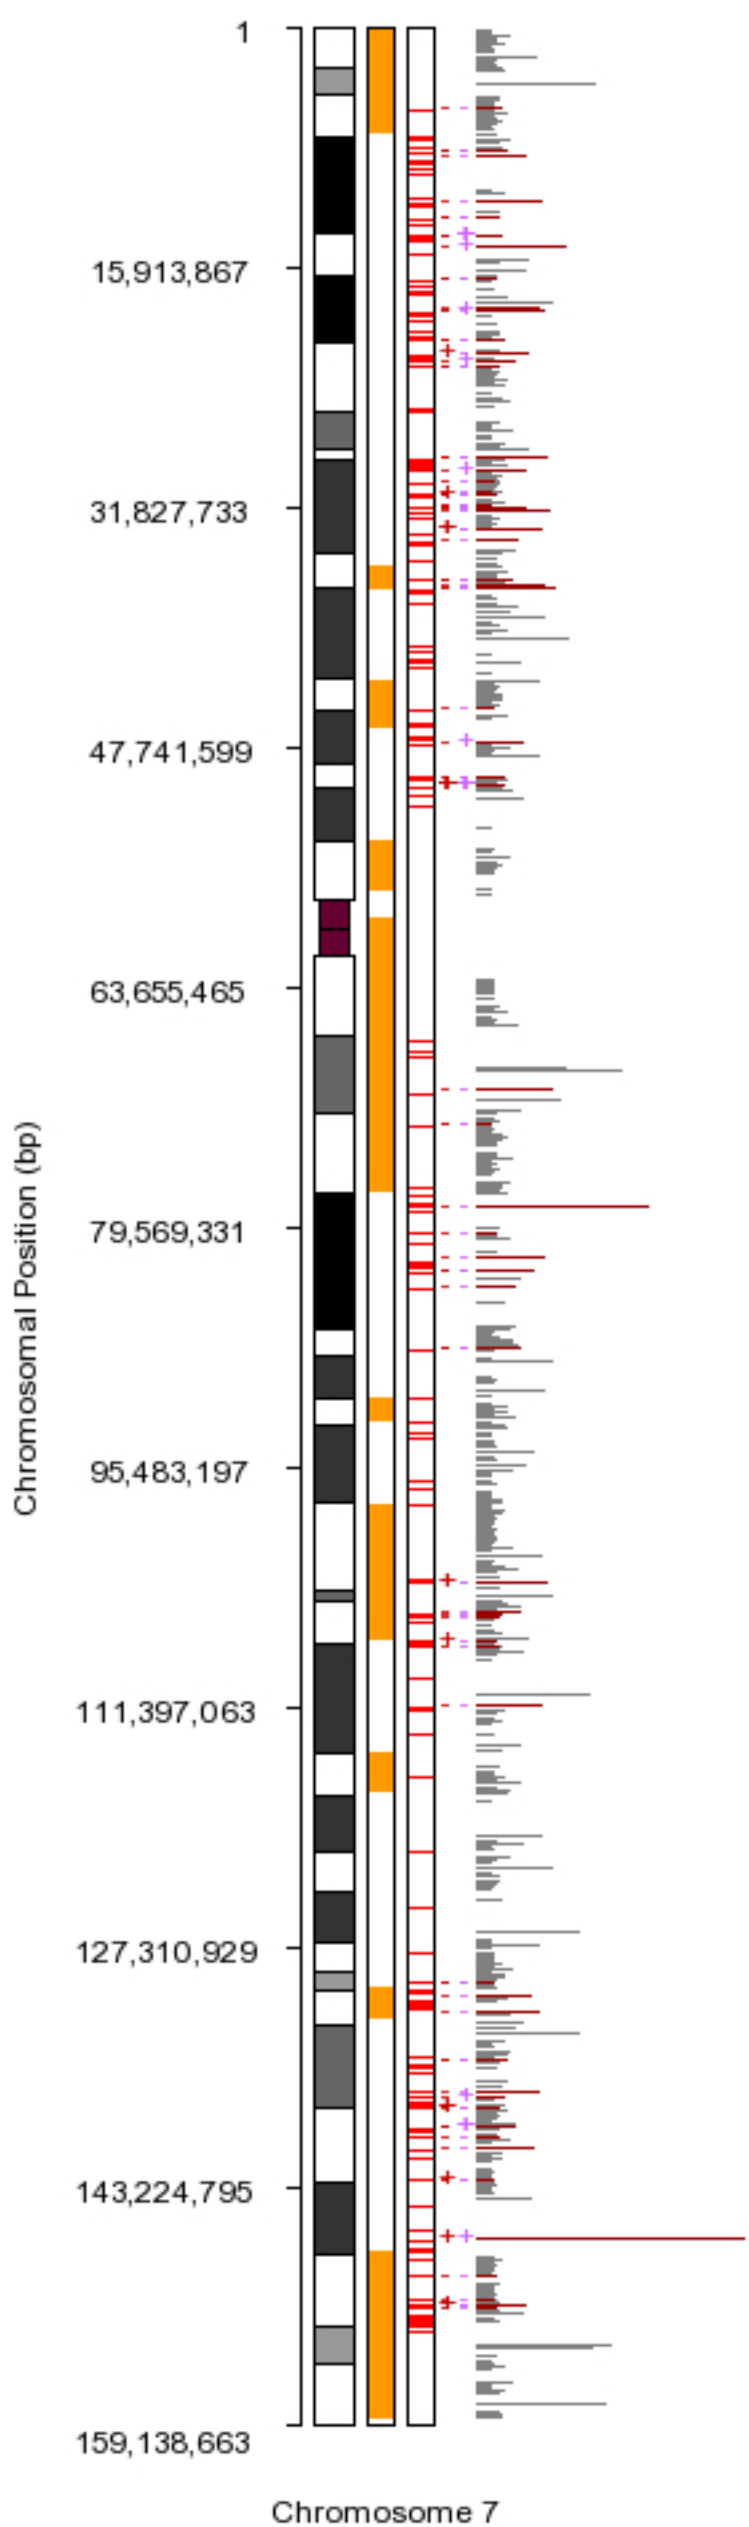





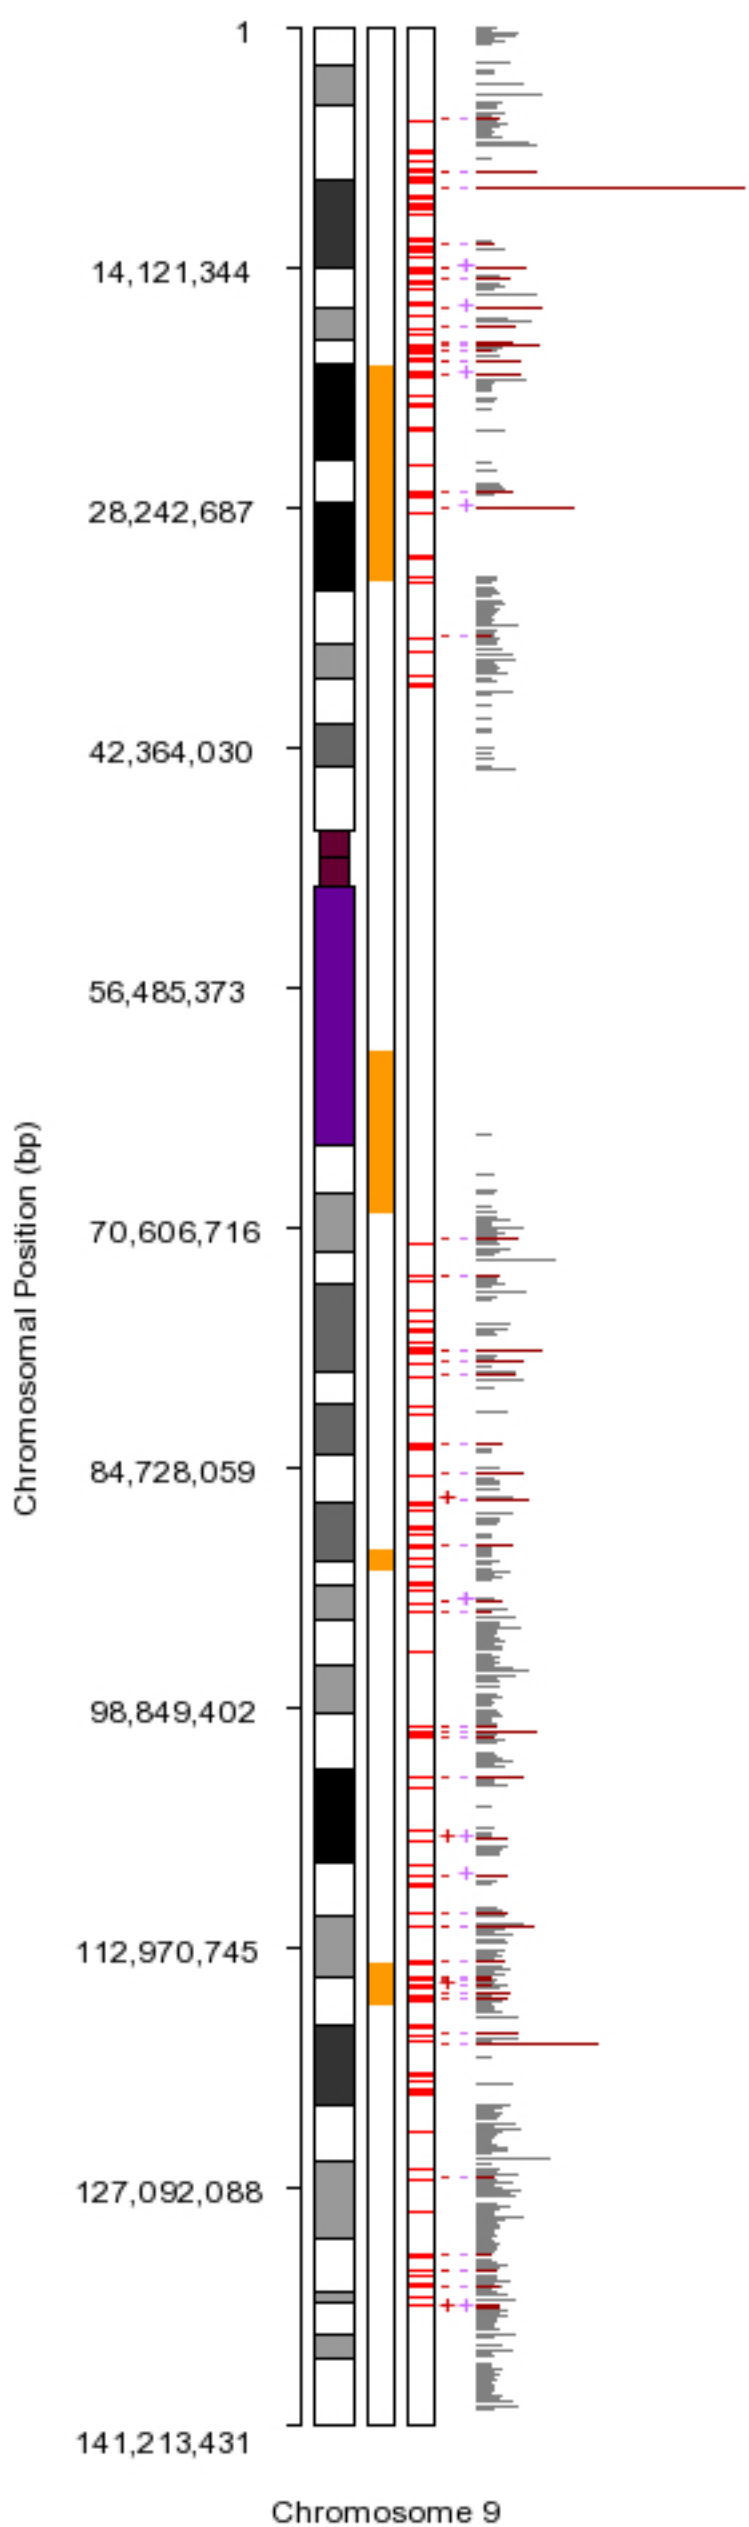

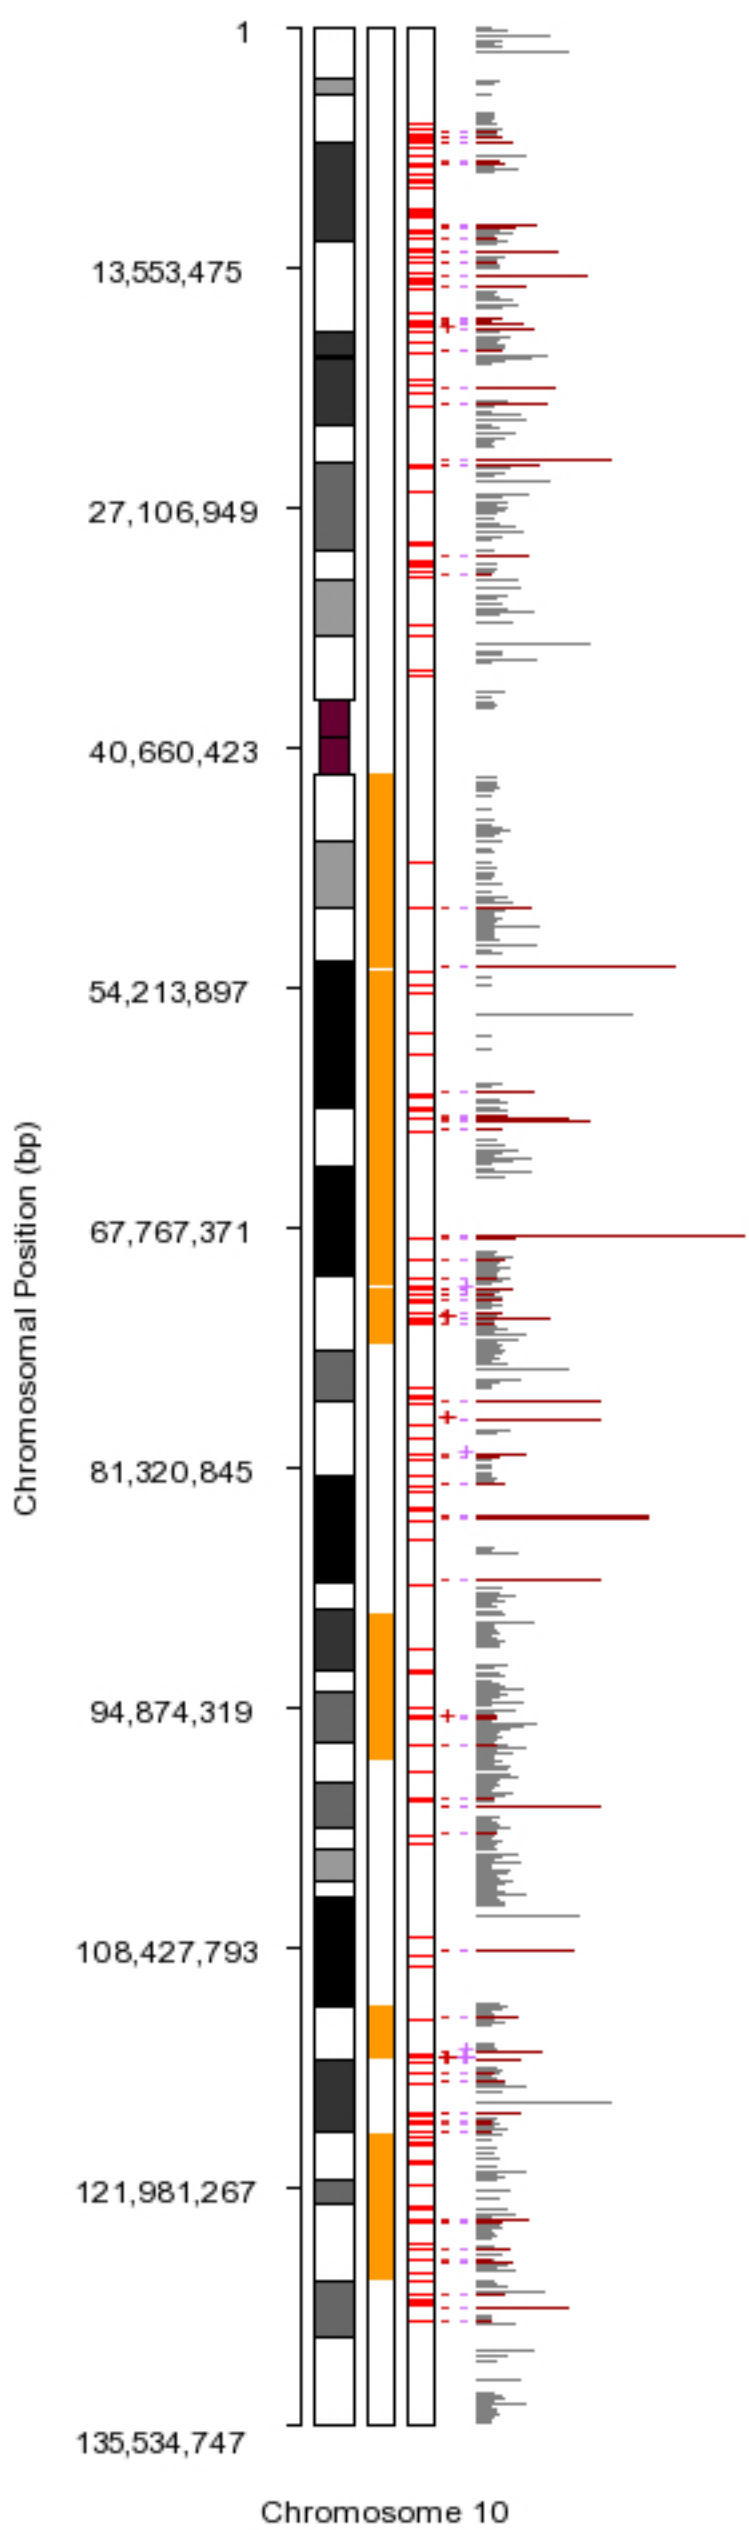

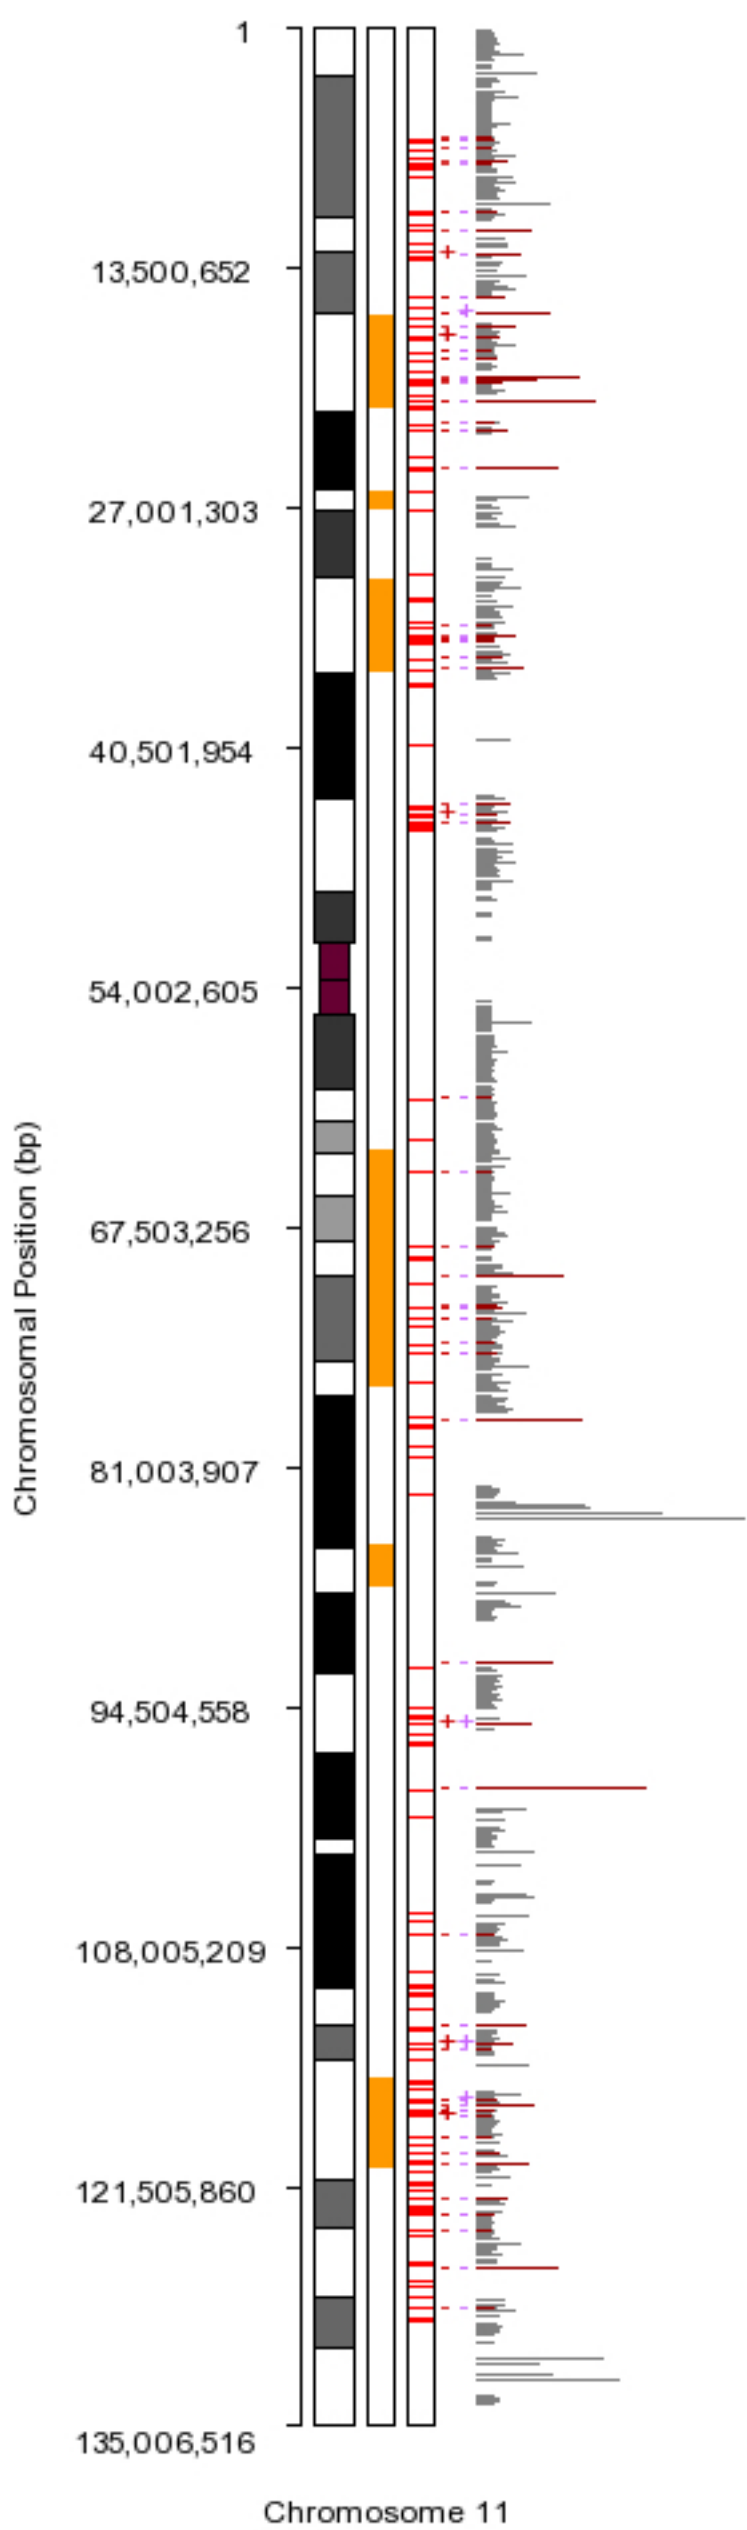

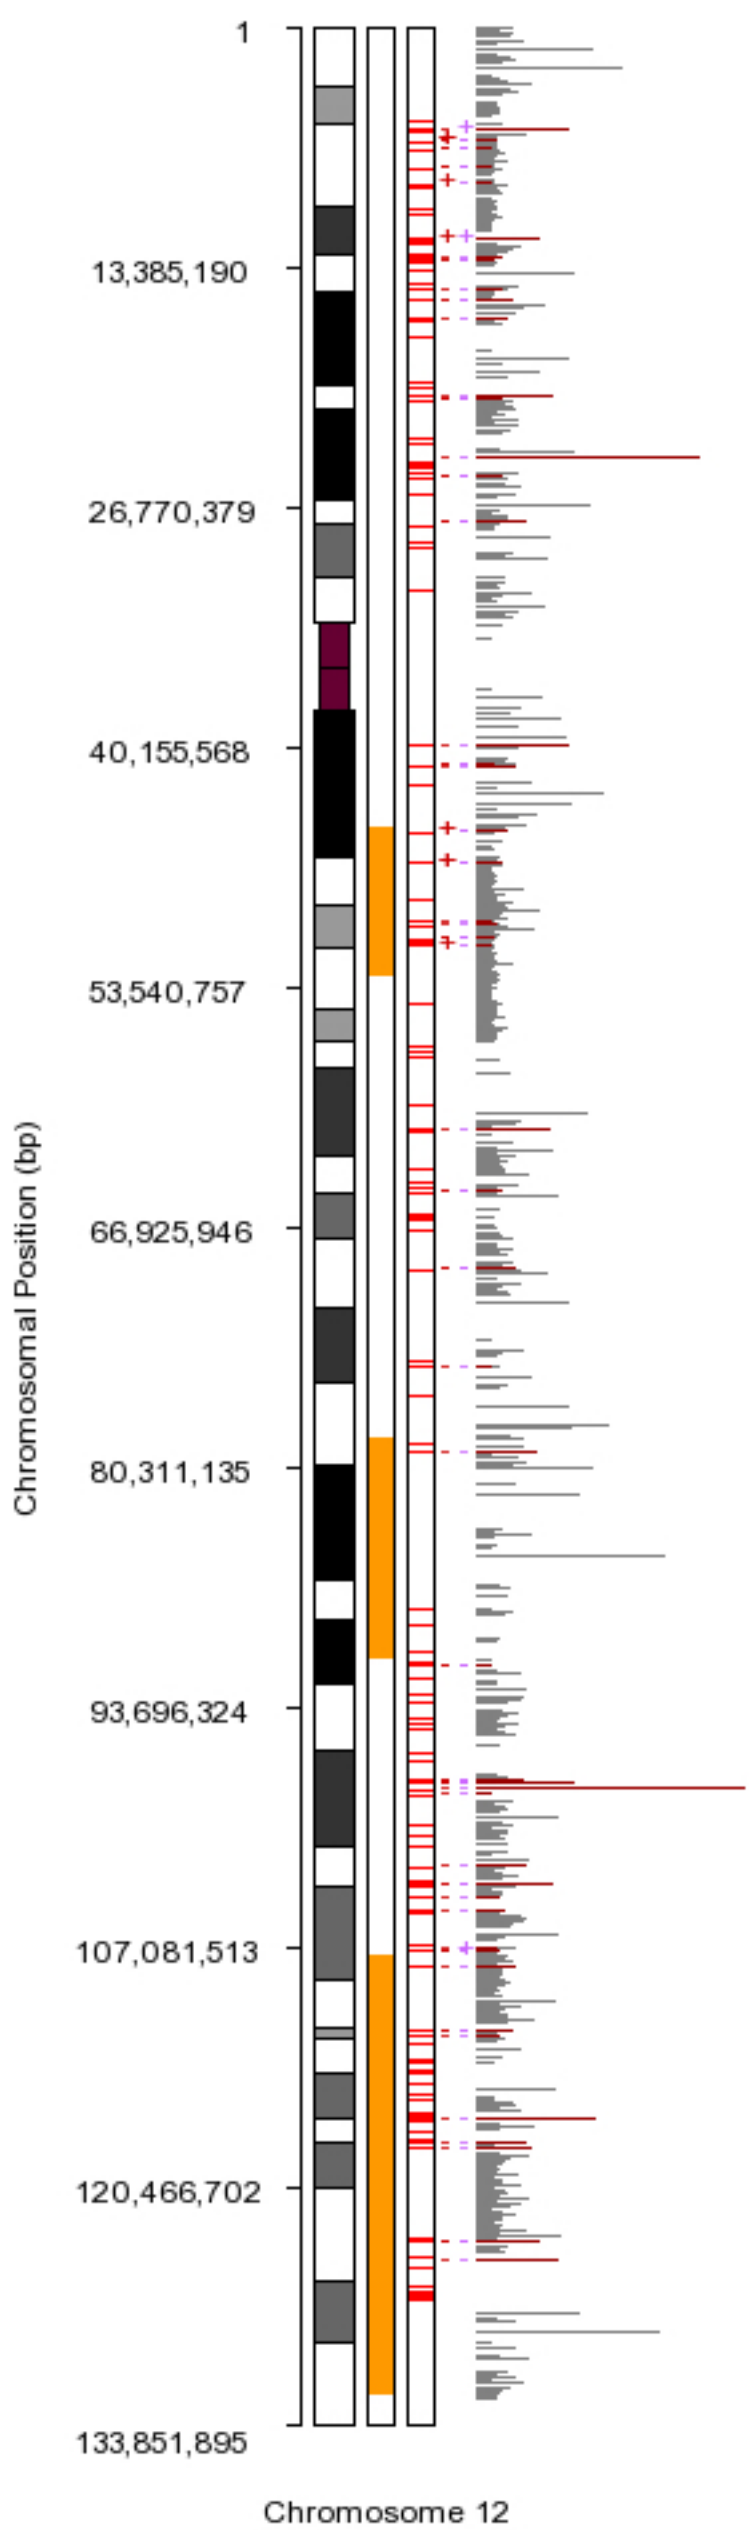

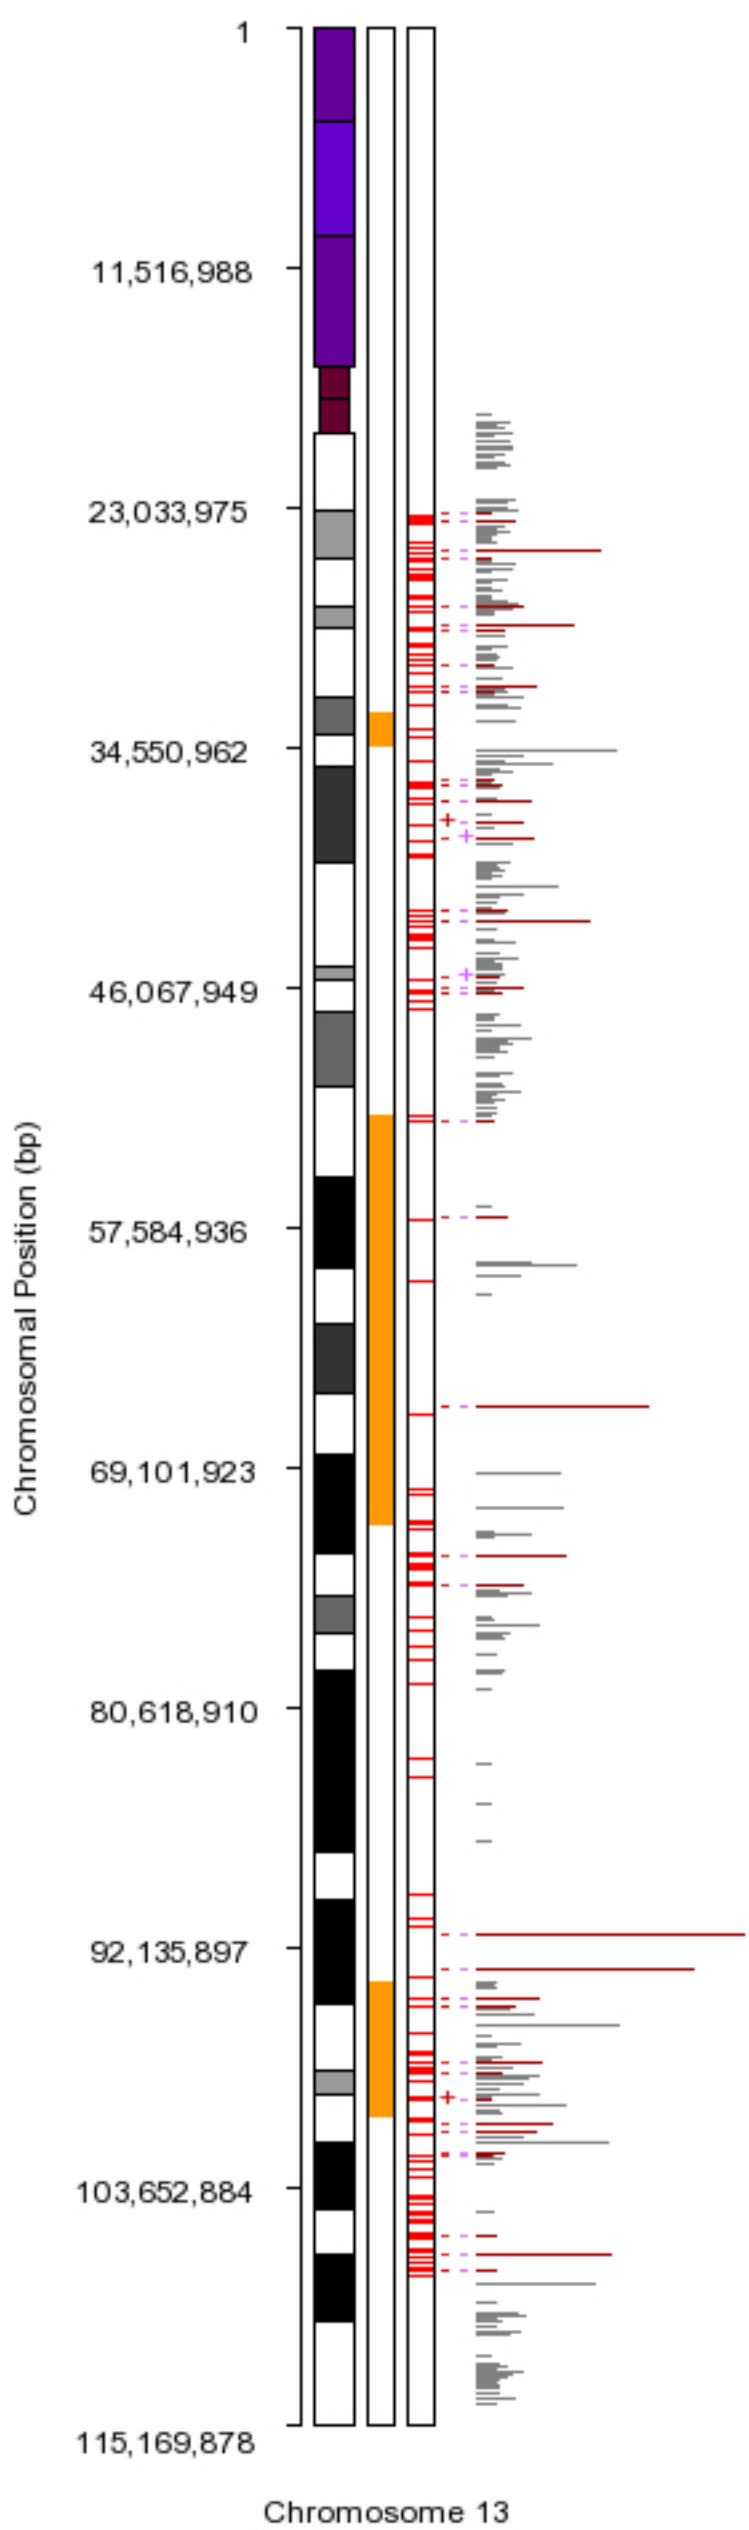

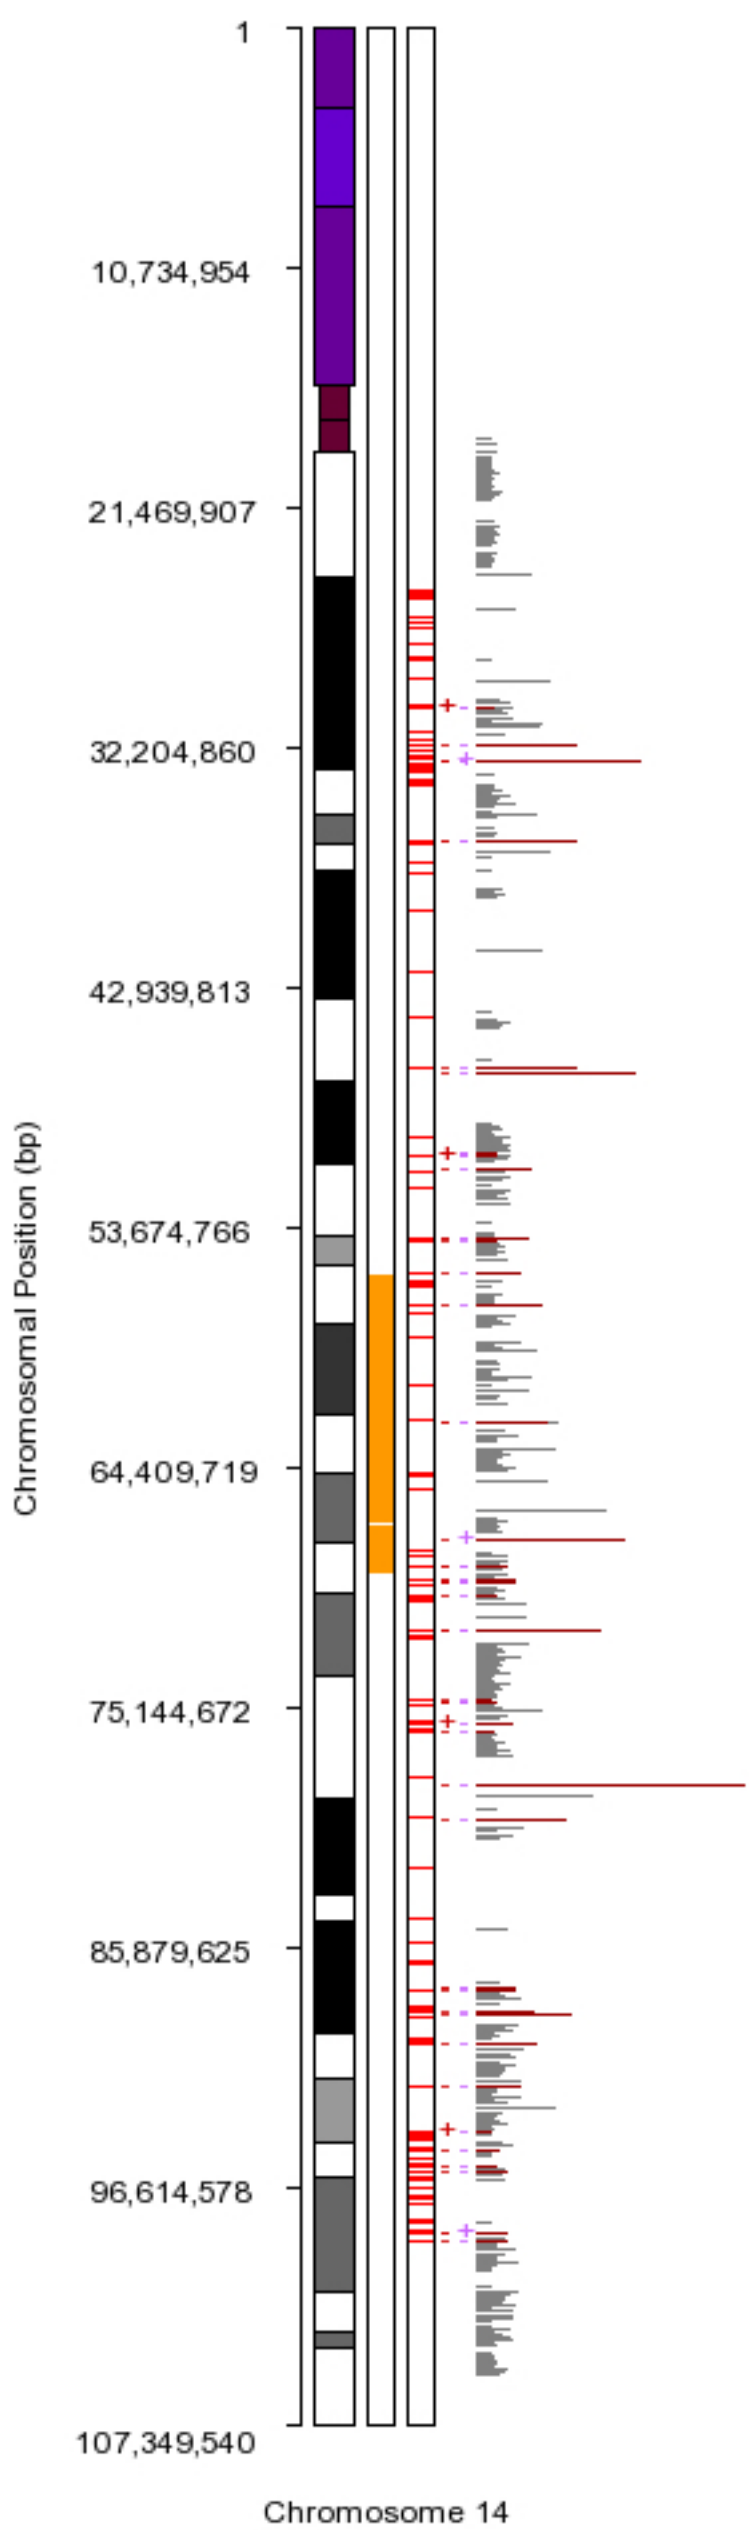

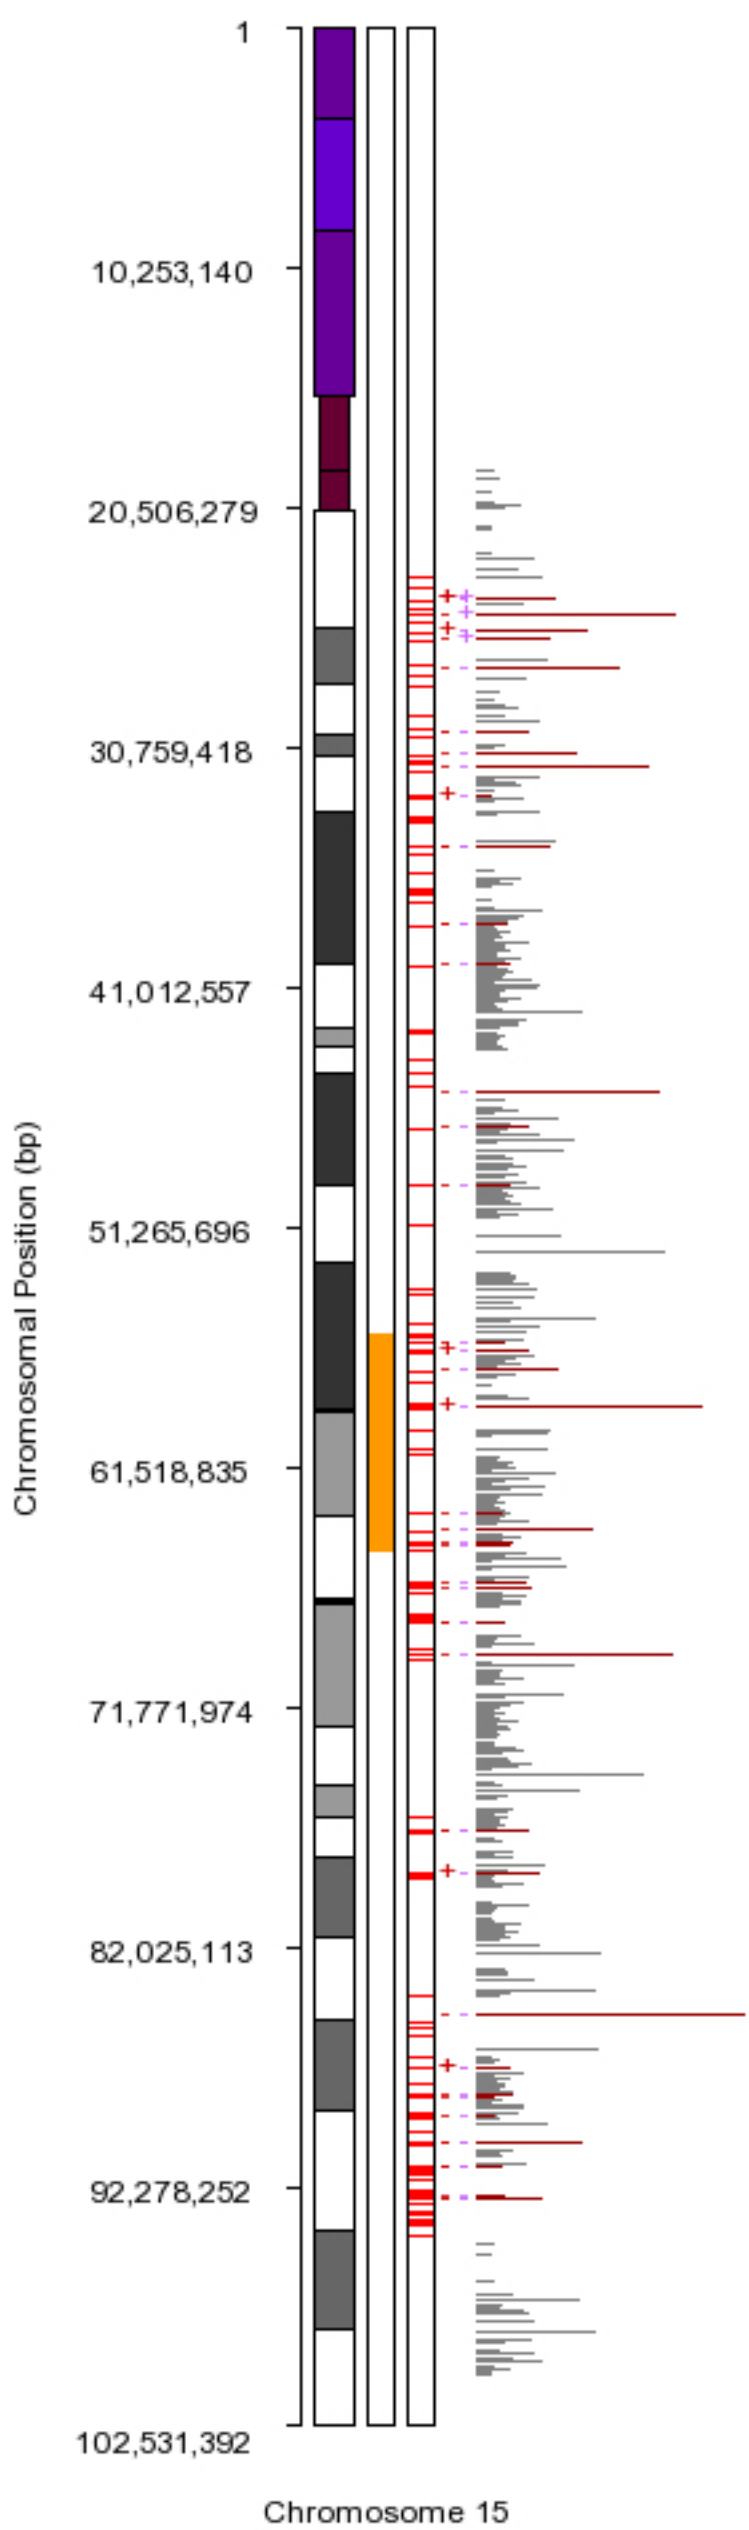



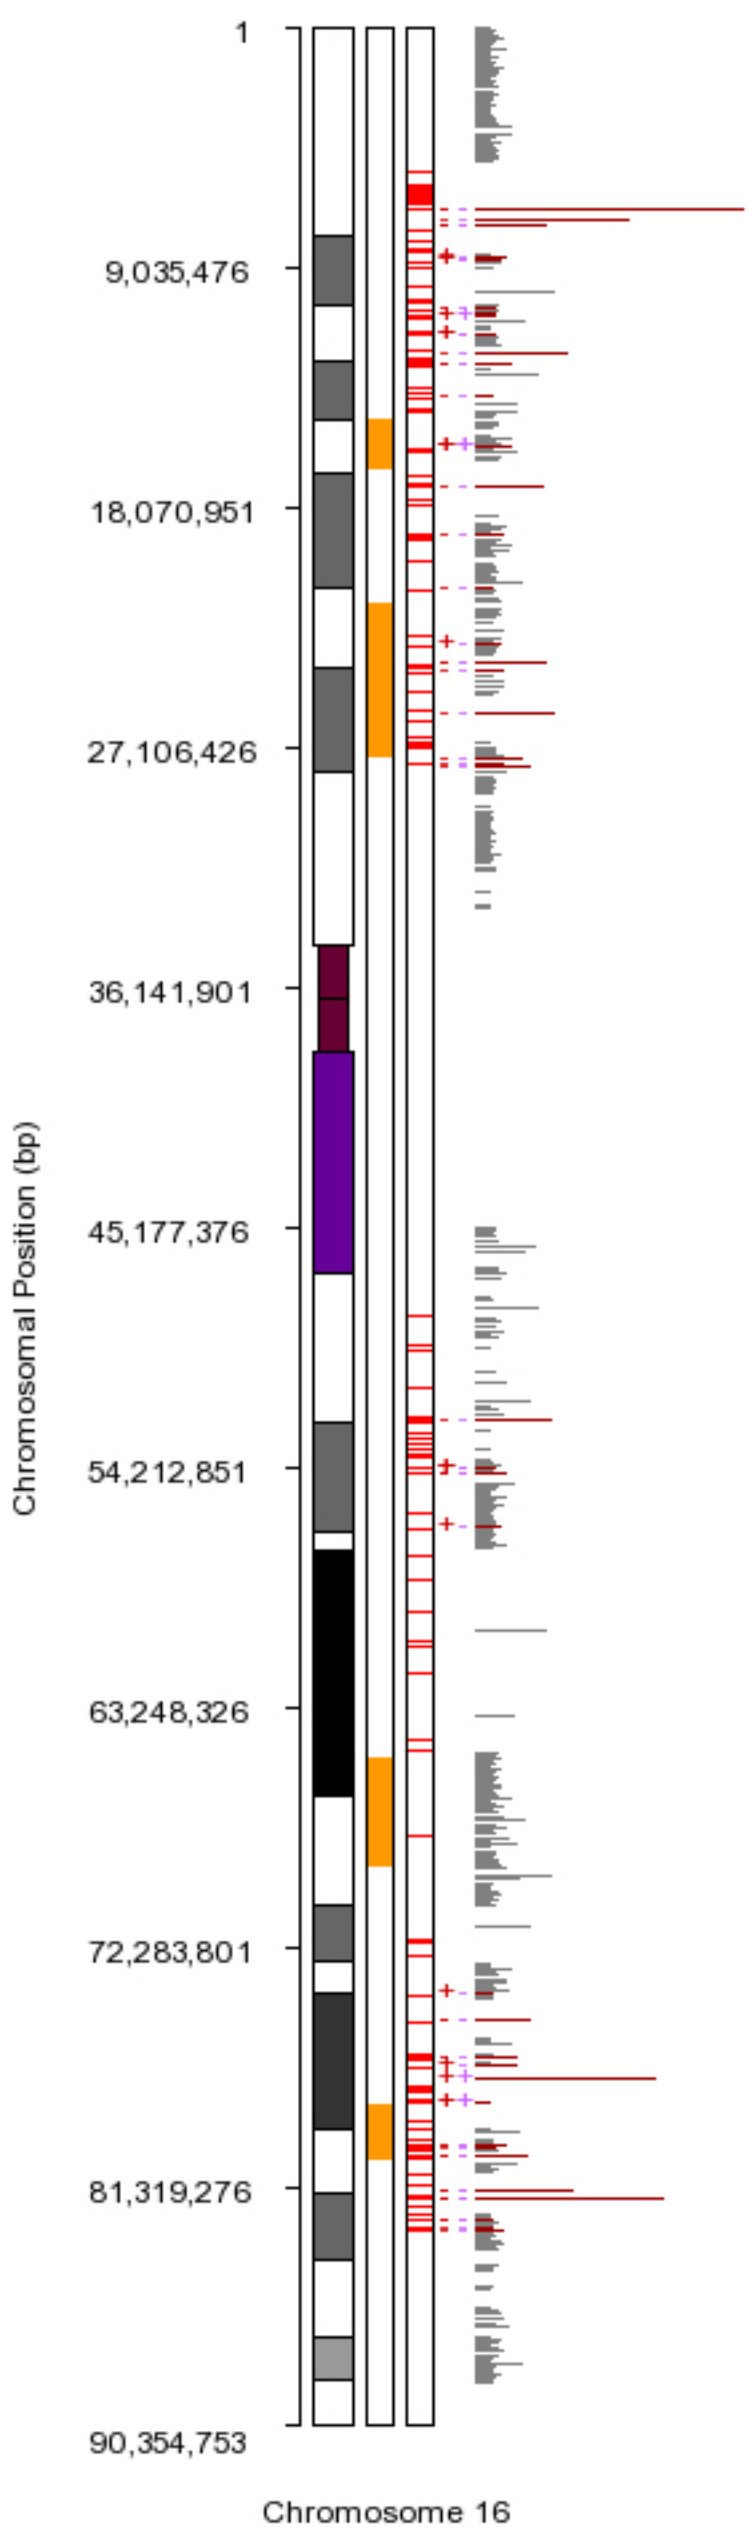

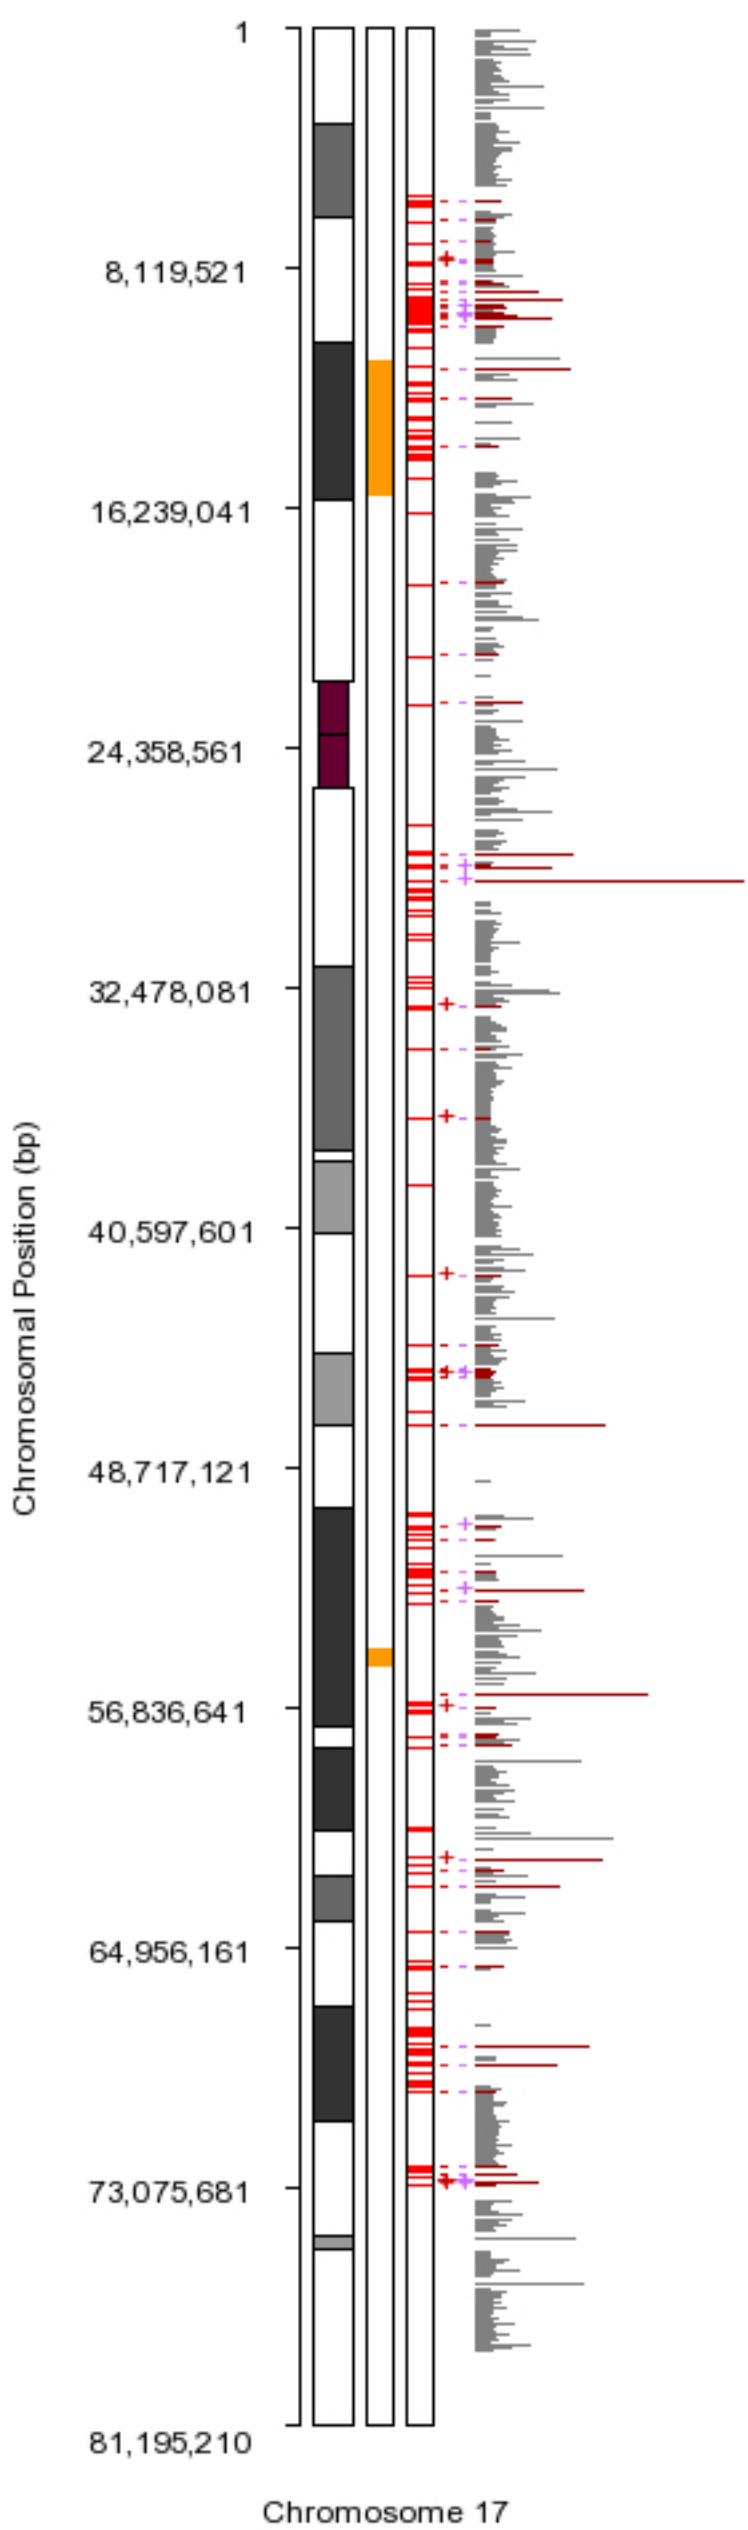

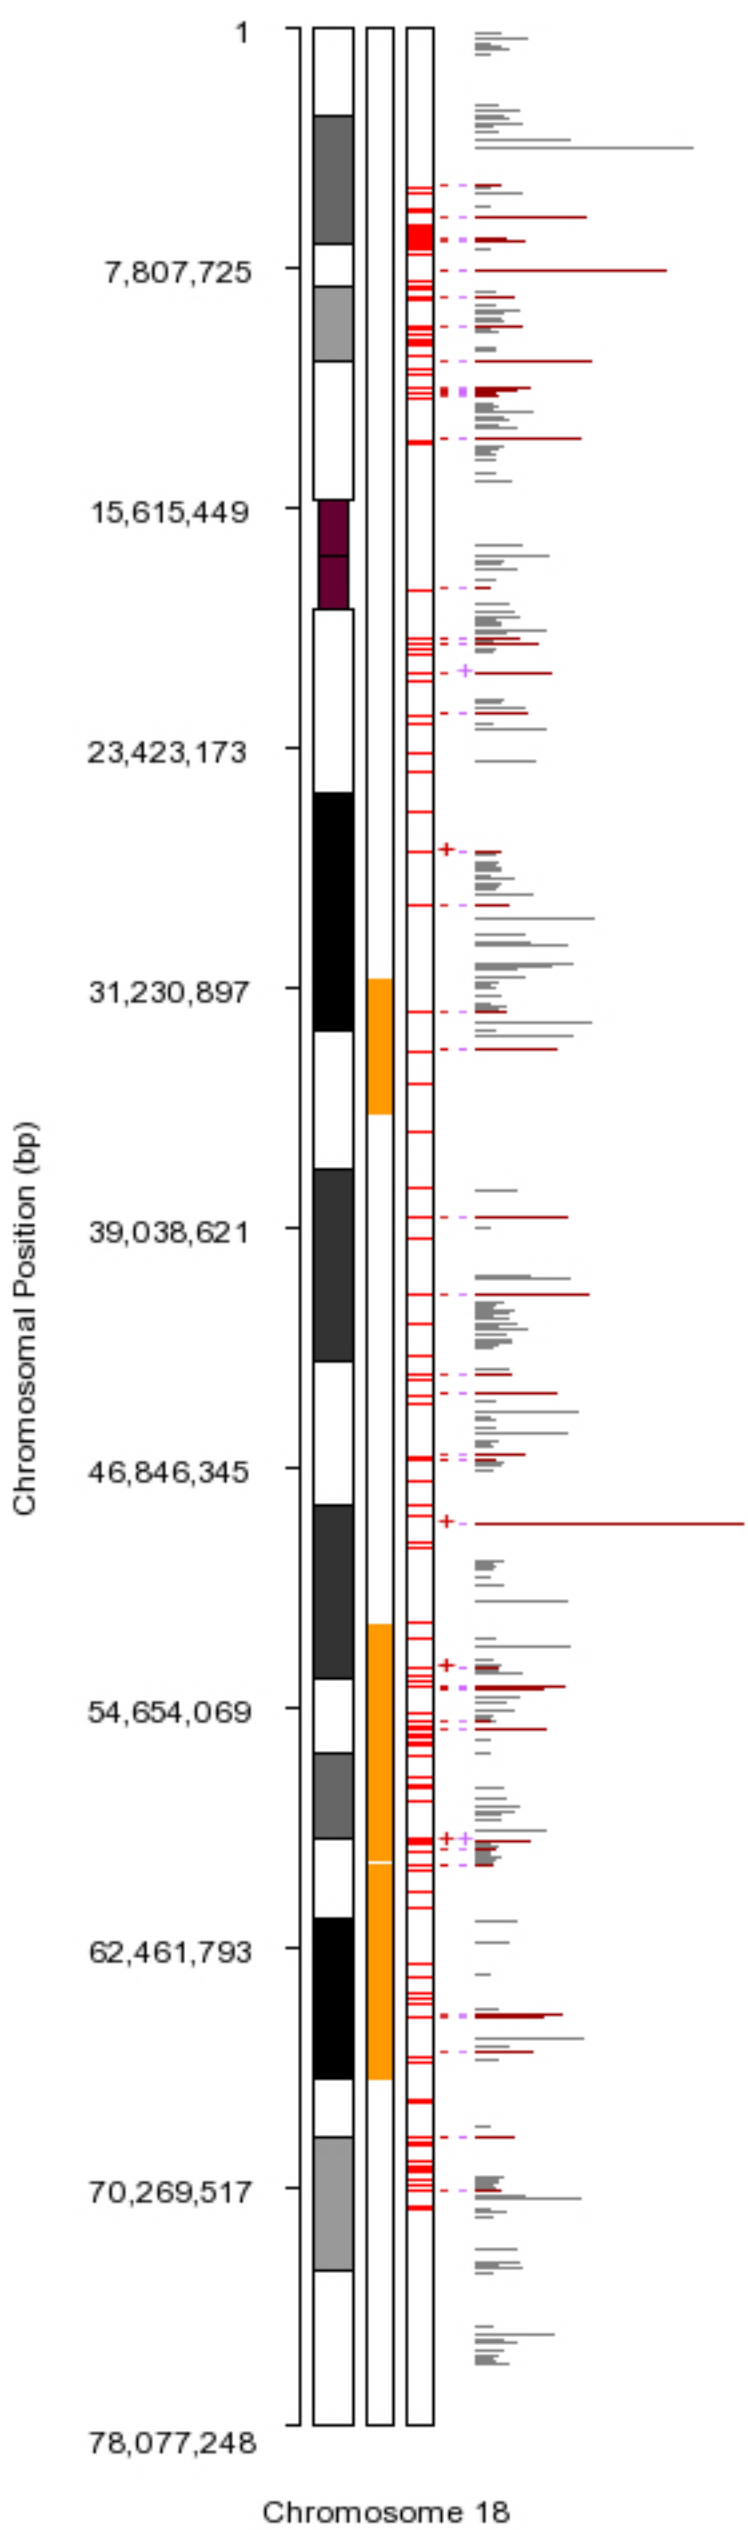

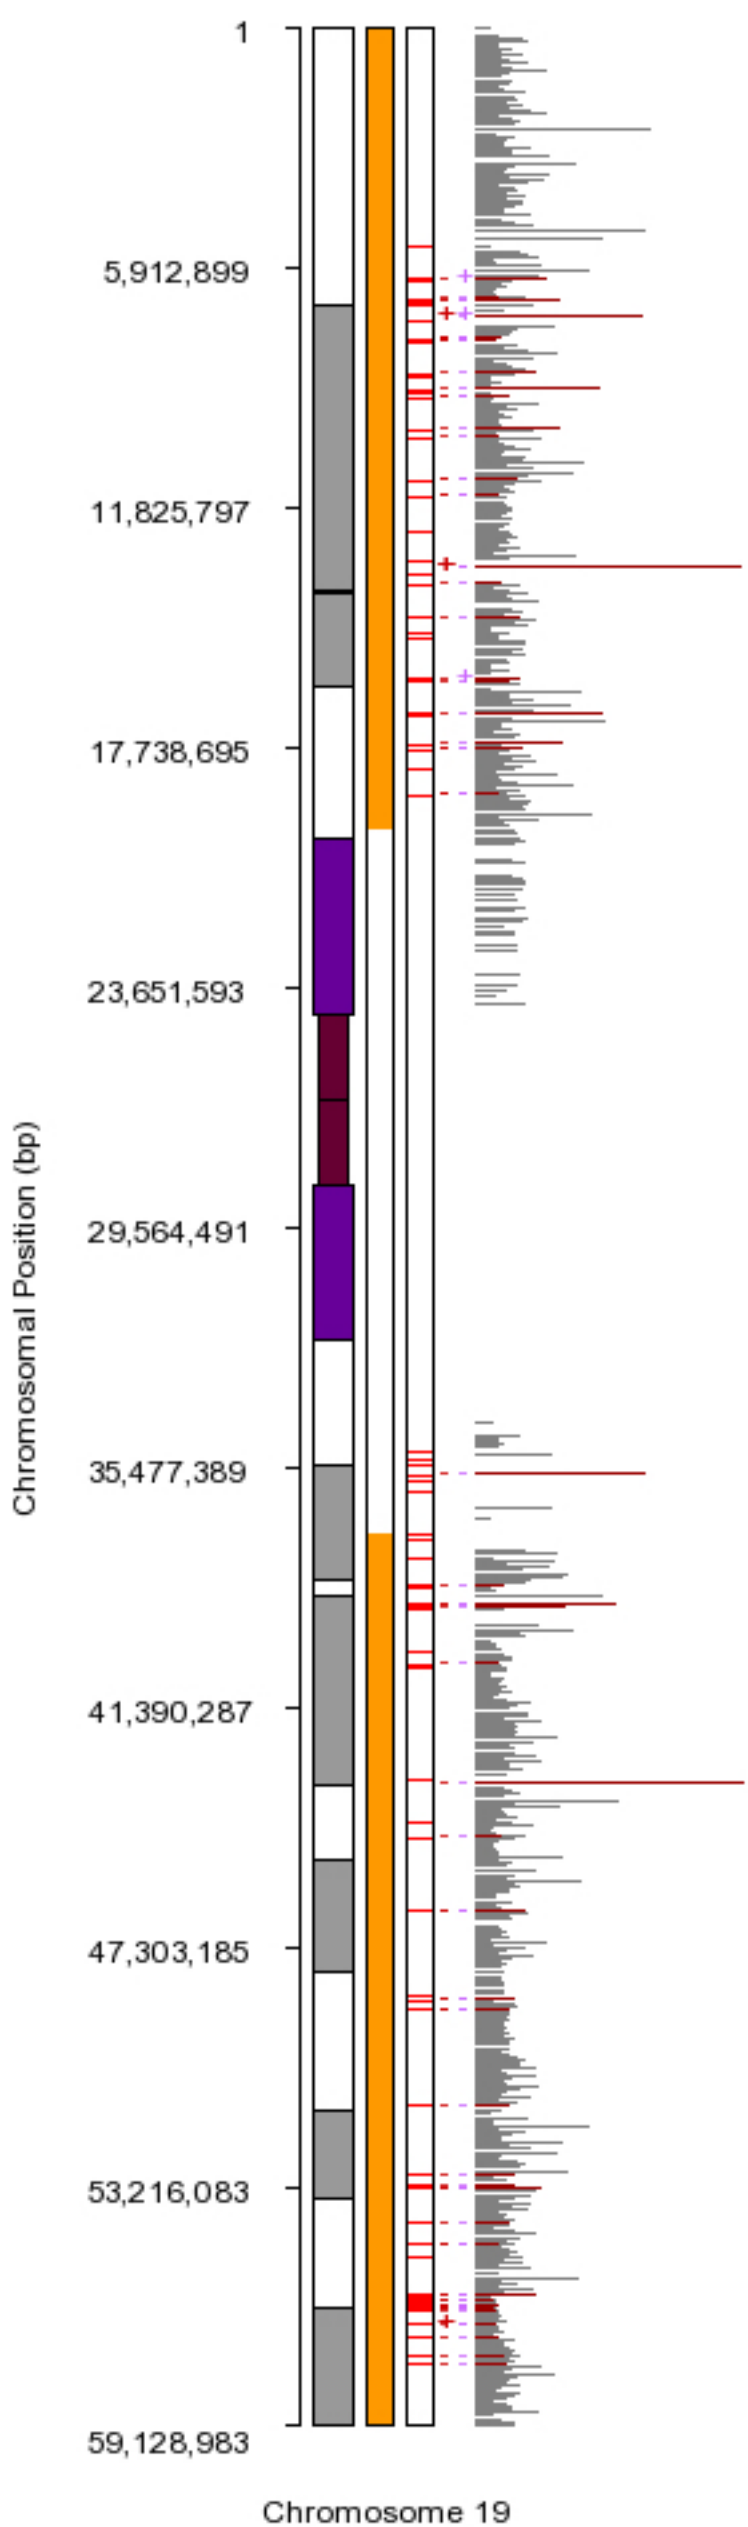

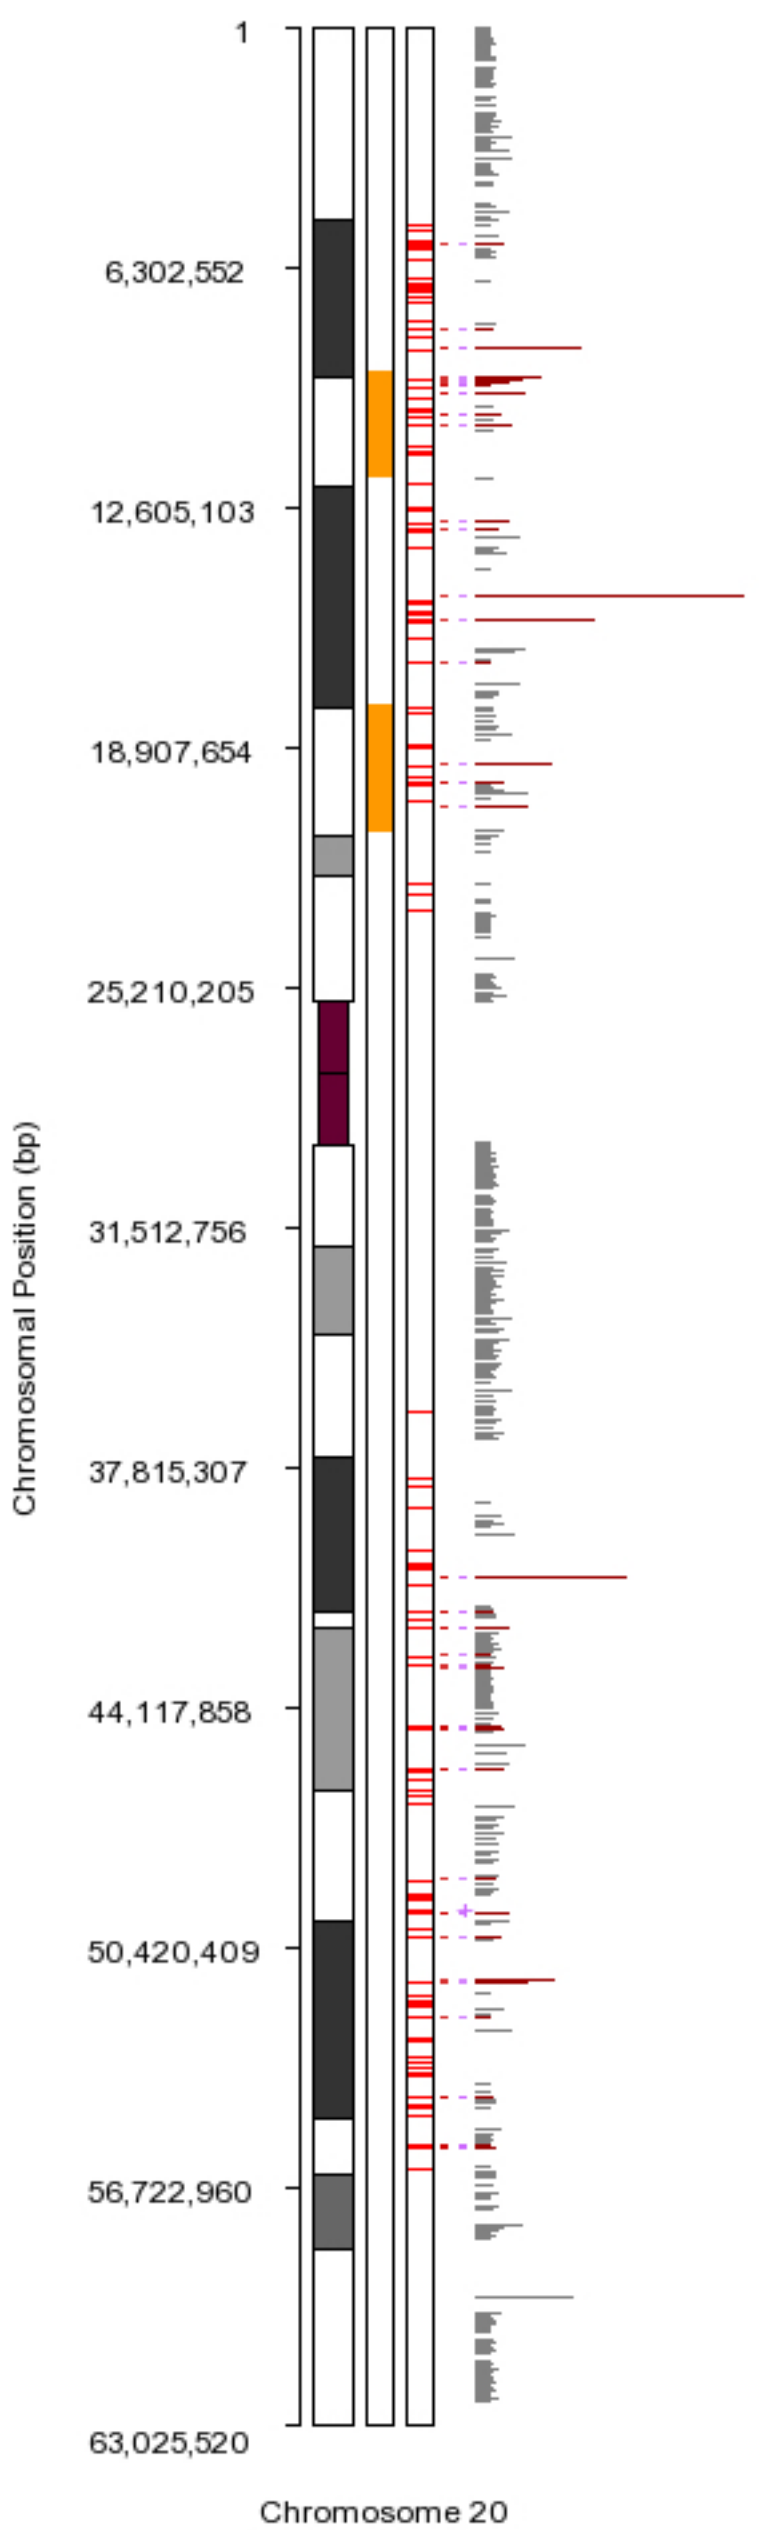



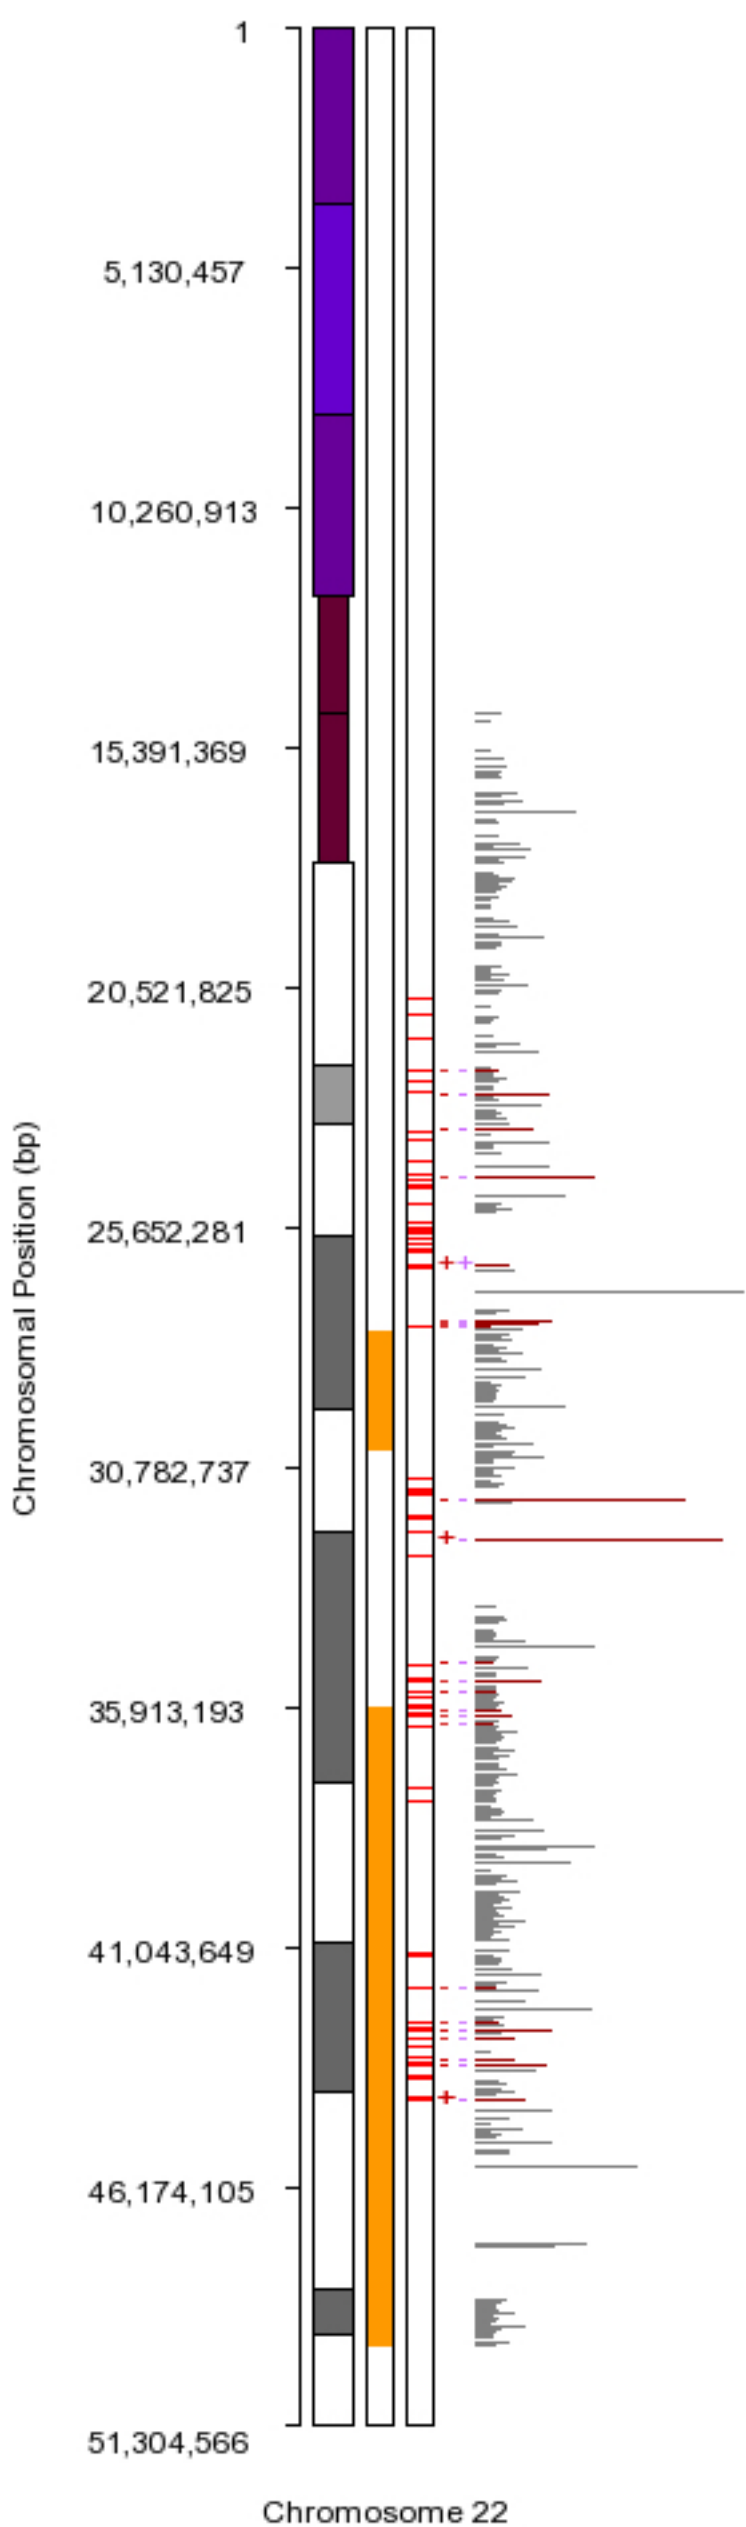

Supplement: 1471-2164-14-67-S2.pdf [file 1471-2164-14-67-S2.pdf]
